# Supplementary material for: Pan-cancer analysis identifies BIRC5 as a prognostic biomarker
Source: Springer Nature journal article supplement (doi:10.1186/s12885-022-09371-0), 2022-03-25
Supplement: MOESM1 [file 12885_2022_9371_MOESM1_ESM.pdf]

# Pathway Analysis Report

## Correlated Genes

This report contains the pathway analysis results for the submitted sample 'Correlated Genes'. Analysis was performed against Reactome version 77 on 08/10/2021. The web link to these results is:

<https://reactome.org/PathwayBrowser/#/ANALYSIS=MjAyMTEwMDgxMjU1MDhfNDI4OA%3D%3D>

Please keep in mind that analysis results are temporarily stored on our server. The storage period depends on usage of the service but is at least 7 days. As a result, please note that this URL is only valid for a limited time period and it might have expired.

## **Table of Contents**

1. [Introduction](#)
2. [Properties](#)
3. [Genome-wide overview](#)
4. [Most significant pathways](#)
5. [Pathways details](#)
6. [Identifiers found](#)
7. [Identifiers not found](#)

# 1. Introduction

Reactome is a curated database of pathways and reactions in human biology. Reactions can be considered as pathway 'steps'. Reactome defines a 'reaction' as any event in biology that changes the state of a biological molecule. Binding, activation, translocation, degradation and classical biochemical events involving a catalyst are all reactions. Information in the database is authored by expert biologists, entered and maintained by Reactome's team of curators and editorial staff. Reactome content frequently cross-references other resources e.g. NCBI, Ensembl, UniProt, KEGG (Gene and Compound), ChEBI, PubMed and GO. Orthologous reactions inferred from annotation for Homo sapiens are available for 17 non-human species including mouse, rat, chicken, puffer fish, worm, fly, yeast, rice, and Arabidopsis. Pathways are represented by simple diagrams following an SBGN-like format.

Reactome's annotated data describe reactions possible if all annotated proteins and small molecules were present and active simultaneously in a cell. By overlaying an experimental dataset on these annotations, a user can perform a pathway over-representation analysis. By overlaying quantitative expression data or time series, a user can visualize the extent of change in affected pathways and its progression. A binomial test is used to calculate the probability shown for each result, and the p-values are corrected for the multiple testing (Benjamini-Hochberg procedure) that arises from evaluating the submitted list of identifiers against every pathway.

To learn more about our Pathway Analysis, please have a look at our relevant publications:

Fabregat A, Sidiropoulos K, Garapati P, Gillespie M, Hausmann K, Haw R, ... D'Eustachio P (2016). The reactome pathway knowledgebase. *Nucleic Acids Research*, 44(D1), D481–D487. <https://doi.org/10.1093/nar/gkv1351>. 

Fabregat A, Sidiropoulos K, Viteri G, Forner O, Marin-Garcia P, Arnau V, ... Hermjakob H (2017). Reactome pathway analysis: a high-performance in-memory approach. *BMC Bioinformatics*, 18. 

## 2. Properties

- This is an **overrepresentation** analysis: A statistical (hypergeometric distribution) test that determines whether certain Reactome pathways are over-represented (enriched) in the submitted data. It answers the question 'Does my list contain more proteins for pathway X than would be expected by chance?' This test produces a probability score, which is corrected for false discovery rate using the Benjamini-Hochberg method. [↗](#)
- 436 out of 629 identifiers in the sample were found in Reactome, where 1039 pathways were hit by at least one of them.
- All non-human identifiers have been converted to their human equivalent. [↗](#)
- This report is filtered to show only results for species 'Homo sapiens' and resource 'all resources'.
- The unique ID for this analysis (token) is MjAyMTEwMDgxMjU1MDhfNDI4OA%3D%3D. This ID is valid for at least 7 days in Reactome's server. Use it to access Reactome services with your data.

### 3. Genome-wide overview

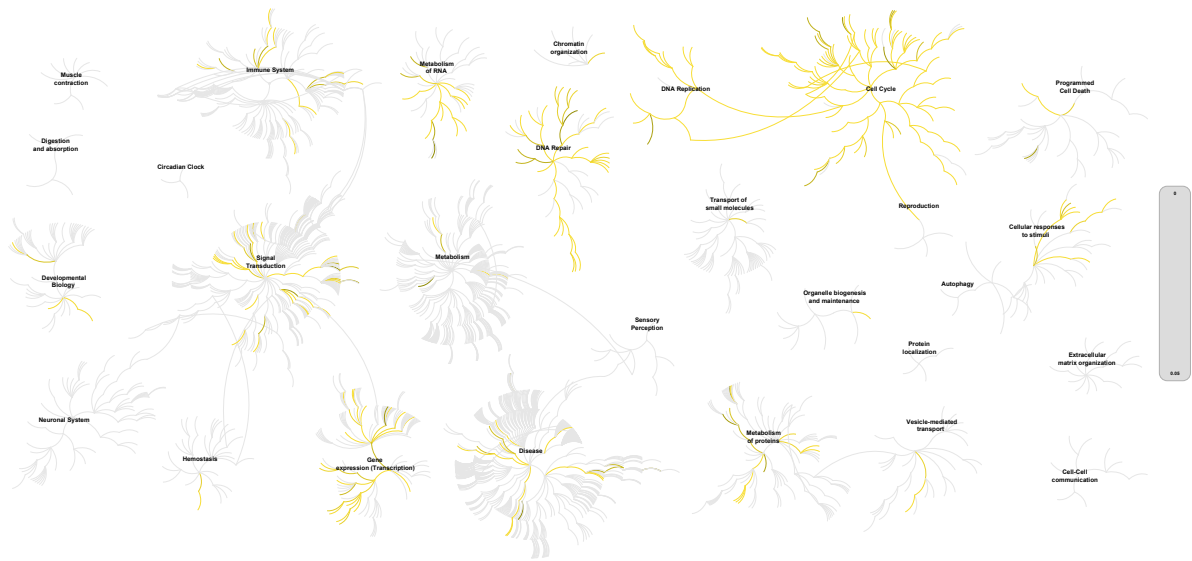

This figure shows a genome-wide overview of the results of your pathway analysis. Reactome pathways are arranged in a hierarchy. The center of each of the circular "bursts" is the root of one top-level pathway, for example "DNA Repair". Each step away from the center represents the next level lower in the pathway hierarchy. The color code denotes over-representation of that pathway in your input dataset. Light grey signifies pathways which are not significantly over-represented.

## 4. Most significant pathways

The following table shows the 25 most relevant pathways sorted by p-value.

| Pathway name                                                                      | Entities  |       |          |          | Reactions |          |
|-----------------------------------------------------------------------------------|-----------|-------|----------|----------|-----------|----------|
|                                                                                   | found     | ratio | p-value  | FDR*     | found     | ratio    |
| G1/S-Specific Transcription                                                       | 25 / 43   | 0.003 | 1.11e-16 | 4.88e-15 | 28 / 28   | 0.002    |
| Amplification of signal from unattached kinetochores via a MAD2 inhibitory signal | 37 / 94   | 0.006 | 1.11e-16 | 4.88e-15 | 4 / 4     | 2.96e-04 |
| Amplification of signal from the kinetochores                                     | 37 / 94   | 0.006 | 1.11e-16 | 4.88e-15 | 4 / 4     | 2.96e-04 |
| Mitotic Spindle Checkpoint                                                        | 41 / 111  | 0.008 | 1.11e-16 | 4.88e-15 | 7 / 7     | 5.18e-04 |
| G2/M Checkpoints                                                                  | 45 / 154  | 0.011 | 1.11e-16 | 4.88e-15 | 24 / 24   | 0.002    |
| G1/S Transition                                                                   | 56 / 150  | 0.01  | 1.11e-16 | 4.88e-15 | 57 / 61   | 0.005    |
| Mitotic G1 phase and G1/S transition                                              | 65 / 173  | 0.012 | 1.11e-16 | 4.88e-15 | 92 / 99   | 0.007    |
| Synthesis of DNA                                                                  | 44 / 133  | 0.009 | 1.11e-16 | 4.88e-15 | 24 / 26   | 0.002    |
| Chromosome Maintenance                                                            | 41 / 138  | 0.009 | 1.11e-16 | 4.88e-15 | 35 / 38   | 0.003    |
| DNA Replication                                                                   | 50 / 142  | 0.01  | 1.11e-16 | 4.88e-15 | 42 / 47   | 0.003    |
| Resolution of Sister Chromatid Cohesion                                           | 43 / 134  | 0.009 | 1.11e-16 | 4.88e-15 | 7 / 8     | 5.92e-04 |
| Separation of Sister Chromatids                                                   | 59 / 195  | 0.013 | 1.11e-16 | 4.88e-15 | 7 / 8     | 5.92e-04 |
| S Phase                                                                           | 54 / 180  | 0.012 | 1.11e-16 | 4.88e-15 | 47 / 54   | 0.004    |
| Cell Cycle, Mitotic                                                               | 162 / 596 | 0.041 | 1.11e-16 | 4.88e-15 | 303 / 350 | 0.026    |
| DNA Replication Pre-Initiation                                                    | 32 / 88   | 0.006 | 1.11e-16 | 4.88e-15 | 18 / 21   | 0.002    |
| Mitotic Prometaphase                                                              | 54 / 211  | 0.015 | 1.11e-16 | 4.88e-15 | 17 / 20   | 0.001    |
| Cell Cycle                                                                        | 187 / 734 | 0.05  | 1.11e-16 | 4.88e-15 | 377 / 449 | 0.033    |
| M Phase                                                                           | 90 / 416  | 0.029 | 1.11e-16 | 4.88e-15 | 64 / 91   | 0.007    |
| Cell Cycle Checkpoints                                                            | 89 / 280  | 0.019 | 1.11e-16 | 4.88e-15 | 39 / 56   | 0.004    |
| Mitotic Metaphase and Anaphase                                                    | 69 / 250  | 0.017 | 1.11e-16 | 4.88e-15 | 22 / 33   | 0.002    |
| Mitotic Anaphase                                                                  | 68 / 249  | 0.017 | 1.11e-16 | 4.88e-15 | 21 / 32   | 0.002    |
| EML4 and NUDC in mitotic spindle formation                                        | 39 / 121  | 0.008 | 1.11e-16 | 4.88e-15 | 3 / 5     | 3.70e-04 |
| RHO GTPases Activate Formins                                                      | 40 / 149  | 0.01  | 1.11e-16 | 4.88e-15 | 4 / 27    | 0.002    |
| Mitotic G2-G2/M phases                                                            | 46 / 214  | 0.015 | 3.33e-16 | 1.43e-14 | 72 / 80   | 0.006    |
| RHO GTPase Effectors                                                              | 57 / 326  | 0.022 | 5.55e-16 | 2.28e-14 | 35 / 113  | 0.008    |

\* False Discovery Rate

## 5. Pathways details

For every pathway of the most significant pathways, we present its diagram, as well as a short summary, its bibliography and the list of inputs found in it.

### 1. G1/S-Specific Transcription (R-HSA-69205)

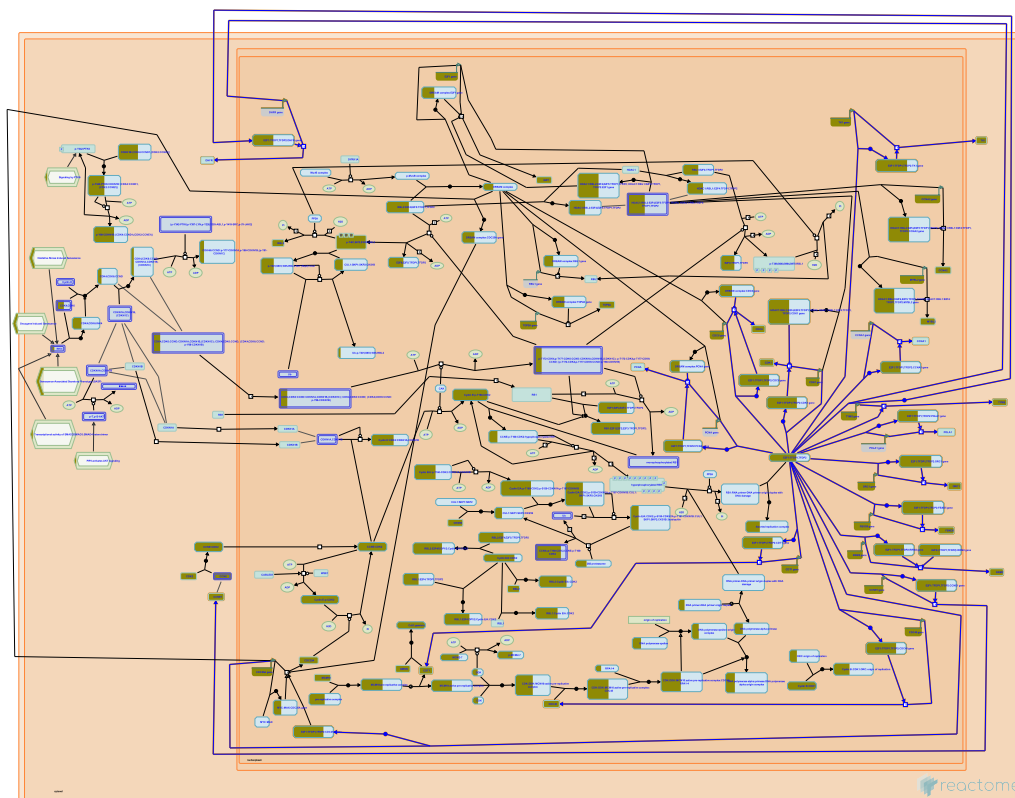

**Cellular compartments:** nucleoplasm.

The E2F family of transcription factors regulate the transition from the G1 to the S phase in the cell cycle. E2F activity is regulated by members of the retinoblastoma protein (pRb) family, resulting in the tight control of the expression of E2F-responsive genes. Phosphorylation of pRb by cyclin D:CDK complexes releases pRb from E2F, inducing E2F-targeted genes such as cyclin E.

E2F1 binds to E2F binding sites on the genome activating the synthesis of the target proteins. For annotation purposes, the reactions regulated by E2F1 are grouped under this pathway and information about the target genes alone are displayed for annotation purposes.

Cellular targets for activation by E2F1 include thymidylate synthase (TYMS) (DeGregori et al. 1995), Rir2 (RRM2) (DeGregori et al. 1995, Giangrande et al. 2004), Dihydrofolate reductase (DHFR) (DeGregori et al. 1995, Wells et al. 1997, Darbinian et al. 1999), Cdc2 (CDK1) (Furukawa et al. 1994, DeGregori et al. 1995, Zhu et al. 2004), Cyclin A1 (CCNA1) (DeGregori et al. 1995, Liu et al. 1998), CDC6 (DeGregori et al. 1995, Yan et al. 1998; Ohtani et al. 1998), CDT1 (Yoshida and Inoue 2004), CDC45 (Arata et al. 2000), Cyclin E (CCNE1) (Ohtani et al. 1995), Emi1 (FBXO5) (Hsu et al. 2002), and ORC1 (Ohtani et al. 1996, Ohtani et al. 1998). The activation of TK1 (Dnk1) (Dou et al. 1994, DeGregori et al. 1995, Giangrande et al. 2004) and CDC25A (DeGregori et al. 1995, Vigo et al. 1999) by E2F1 is conserved in *Drosophila* (Duronio and O'Farrell 1994, Reis and Edgar 2004).

RRM2 protein is involved in dNTP level regulation and activation of this enzyme results in higher levels of dNTPs in anticipation of S phase. E2F activation of RRM2 has been shown also in *Drosophila* by Duronio and O'Farrell (1994). E2F1 activation of CDC45 is shown in mouse cells by using human E2F1 construct (Arata et al. 2000). Cyclin E is also transcriptionally regulated by E2F1. Cyclin E protein plays important role in the transition of G1 in S phase by associating with CDK2 (Ohtani et al. 1996). E2F1-mediated activation of PCNA has been demonstrated in *Drosophila* (Duronio and O'Farrell 1994) and in some human cells by using recombinant adenovirus constructs (DeGregori et al. 1995). E2F1-mediated activation of the DNA polymerase alpha subunit p180 (POLA1) has been demonstrated in some human cells. It has also been demonstrated in *Drosophila* by Ohtani and Nevins (1994). It has been observed in *Drosophila* that E2F1 induced expression of Orc1 stimulates ORC1 6 complex formation and binding to the origin of replication (Asano and Wharton 1999). ORC1 6 recruit CDC6 and CDT1 that are required to recruit the MCM2 7 replication helicases. E2F1 regulation incorporates a feedback mechanism wherein Geminin (GMNN) can inhibit MCM2 7 recruitment of ORC1 6 complex by interacting with CDC6/CDT1. The activation of CDC25A and TK1 (Dnk1) by E2F1 has been inferred from similar events in *Drosophila* (Duronio RJ and O'Farrell 1994; Reis and Edgar 2004). E2F1 activates string (CDC25) that in turn activates the complex of Cyclin B and CDK1. A similar phenomenon has been observed in mouse NIH 3T3 cells and in Rat1 cells.

## References

- DeGregori J, Kowalik T & Nevins JR (1995). Cellular targets for activation by the E2F1 transcription factor include DNA synthesis- and G1/S-regulatory genes. *Mol Cell Biol*, 15, 4215-24. [↗](#)
- Yoshida K & Inoue I (2004). Regulation of Geminin and Cdt1 expression by E2F transcription factors. *Oncogene*, 23, 3802-12. [↗](#)
- Arata Y, Fujita M, Ohtani K, Kijima S & Kato JY (2000). Cdk2-dependent and -independent pathways in E2F-mediated S phase induction. *J Biol Chem*, 275, 6337-45. [↗](#)
- Yan Z, DeGregori J, Shohet R, Leone G, Stillman B, Nevins JR & Williams RS (1998). Cdc6 is regulated by E2F and is essential for DNA replication in mammalian cells. *Proc Natl Acad Sci U S A*, 95, 3603-8. [↗](#)
- Ohtani K, Tsujimoto A, Ikeda M & Nakamura M (1998). Regulation of cell growth-dependent expression of mammalian CDC6 gene by the cell cycle transcription factor E2F. *Oncogene*, 17, 1777-85. [↗](#)

## Edit history

| Date       | Action   | Author                  |
|------------|----------|-------------------------|
| 2003-06-05 | Created  | Walworth N, O'Donnell M |
| 2018-12-21 | Modified | D'Eustachio P           |

## Entities found in this pathway (15)

| Input | UniProt Id | Input | UniProt Id | Input | UniProt Id |
|-------|------------|-------|------------|-------|------------|
| CCNE1 | P24864     | CDC45 | O75419     | CDC6  | Q99741     |
| CDK1  | P06493     | CDT1  | Q9H211     | E2F1  | Q01094     |
| E2F2  | Q16254     | FBXO5 | Q9UKT4     | ORC1  | Q13415     |
| RBL2  | Q08999     | RRM2  | P31350     | TFDP1 | Q14186     |
| TK1   | P04183     | TYMS  | P04818     |       |            |

| Input | Ensembl Id      | Input  | Ensembl Id      | Input | Ensembl Id      |
|-------|-----------------|--------|-----------------|-------|-----------------|
| CCNE1 | ENSG00000105173 | CDC25A | ENSG00000164045 | CDC45 | ENSG00000093009 |
| CDC6  | ENSG00000094804 | CDK1   | ENSG00000170312 | CDT1  | ENSG00000167513 |
| FBXO5 | ENSG00000112029 | ORC1   | ENSG00000085840 | RRM2  | ENSG00000171848 |
| TK1   | ENSG00000167900 | TYMS   | ENSG00000176890 |       |                 |



| Input | UniProt Id | Input | UniProt Id | Input  | UniProt Id |
|-------|------------|-------|------------|--------|------------|
| NUP85 | Q9BW27     | PLK1  | P53350     | RANBP2 | P49792     |
| RCC2  | Q9P258     | SGO1  | Q5FBB7     | SGO2   | Q562F6     |
| SKA1  | Q96BD8     | SKA2  | Q8WVK7     | SPC24  | Q8NBT2     |
| SPC25 | Q9HBM1     | ZWINT | O95229     |        |            |

### 3. Amplification of signal from the kinetochores (R-HSA-141424)

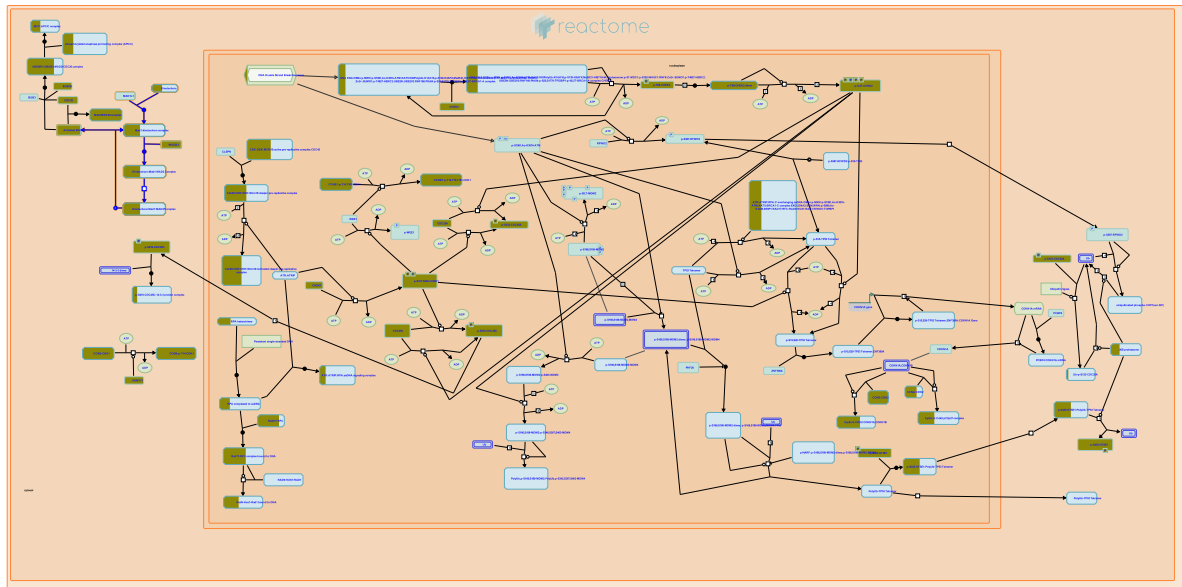

**Cellular compartments:** cytosol.

A single unattached kinetochore is capable of preventing cells from exiting mitosis. The mitotic checkpoint provides a way for a localized defect to affect the global biochemical status of the cell. In principle, the signal that is generated at an unattached kinetochore diffuses throughout the cell to affect its target. There are currently two models for how this is achieved. One model is based on the observation that the Mad2 checkpoint protein binds and is rapidly released from unattached kinetochores. The kinetochore is believed to act as a catalyst that converts Mad2 into an inhibitory state that diffuses throughout the cell upon its release from the kinetochore. A second model proposes that the signal is amplified by a kinase cascade much like a conventional signal transduction pathway. This kinase cascade is believed to be comprised of the checkpoint kinases, hBUBR1, hBUB1, hMPS1.

#### References

Chan GK & Yen TJ (2003). The mitotic checkpoint: a signaling pathway that allows a single unattached kinetochore to inhibit mitotic exit. *Prog Cell Cycle Res*, 5, 431-9. [🔗](#)

#### Edit history

| Date       | Action   | Author    |
|------------|----------|-----------|
| 2004-05-05 | Authored | Yen TJ    |
| 2004-05-05 | Created  | Yen TJ    |
| 2021-05-21 | Modified | Shorser S |

#### Entities found in this pathway (38)

| Input | UniProt Id     | Input | UniProt Id | Input | UniProt Id |
|-------|----------------|-------|------------|-------|------------|
| AURKA | Q96GD4         | AURKB | Q96GD4     | BIRC5 | O15392     |
| BUB1  | O43683, O60566 | BUB1B | O60566     | CDC20 | Q12834     |
| CDCA8 | Q53HL2         | CENPA | P49450     | CENPE | Q02224     |
| CENPF | P49454         | CENPH | Q9H3R5     | CENPK | Q9BS16     |

| Input  | UniProt Id | Input  | UniProt Id | Input  | UniProt Id |
|--------|------------|--------|------------|--------|------------|
| CENPL  | Q8N0S6     | CENPM  | Q9NSP4     | CENPN  | Q96H22     |
| CENPO  | Q9BU64     | CENPU  | Q71F23     | DSN1   | Q9H410     |
| ERCC6L | Q2NKX8     | INCENP | Q9NQS7     | KIF18A | Q8NI77     |
| KIF2C  | Q99661     | MAD2L1 | Q13257     | NDC80  | O14777     |
| NUDC   | Q9Y266     | NUF2   | Q9BZD4     | NUP37  | Q8NFH4     |
| NUP85  | Q9BW27     | PLK1   | P53350     | RANBP2 | P49792     |
| RCC2   | Q9P258     | SGO1   | Q5FBB7     | SGO2   | Q562F6     |
| SKA1   | Q96BD8     | SKA2   | Q8WVK7     | SPC24  | Q8NBT2     |
| SPC25  | Q9HBM1     | ZWINT  | O95229     |        |            |

#### 4. Mitotic Spindle Checkpoint (R-HSA-69618)

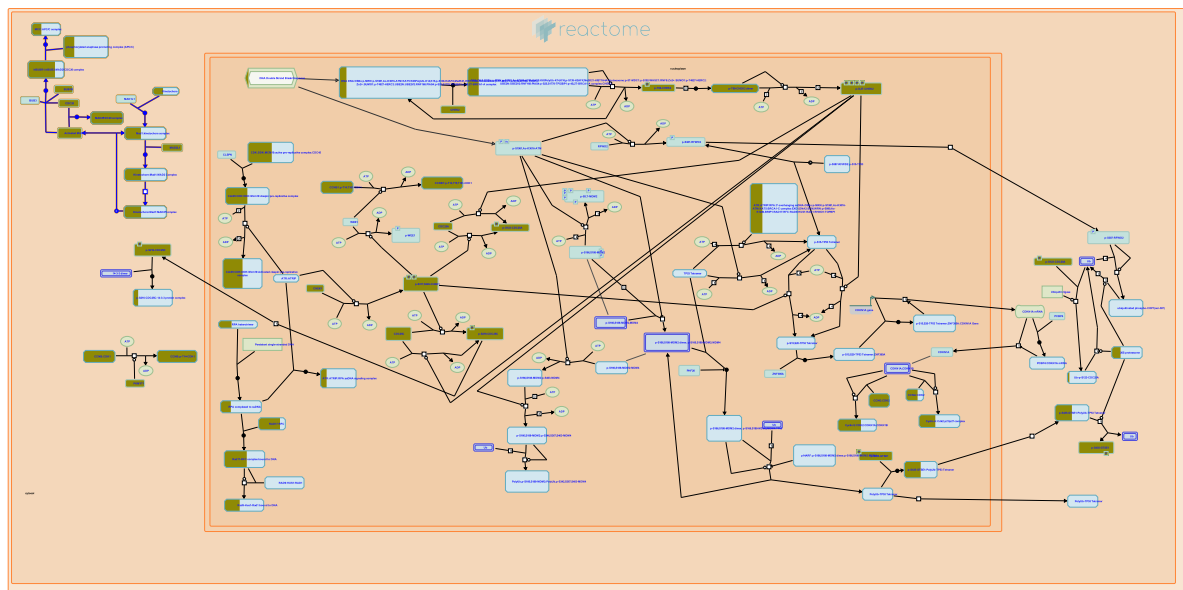

**Cellular compartments:** cytosol.

The mitotic checkpoint or spindle assembly checkpoint is an evolutionarily conserved mechanism that ensures that cells with misaligned chromosomes do not exit mitosis and divide to form aneuploid cells. As chromosome attachment to the spindle microtubules is a stochastic process, not all chromosomes achieve alignment at the spindle equator at the same time. It is therefore essential that even a single unaligned chromosome can prevent the onset of anaphase. The ability of the checkpoint to monitor the status of chromosome alignment is achieved by assigning checkpoint proteins to the kinetochore, a macromolecular complex that resides at centromeres of chromosomes that establishes connections with spindle microtubules.

The checkpoint proteins monitor, in an unknown way, the mechanical activities between kinetochore-associated proteins and microtubules. Defects in mechanical activities at kinetochores activate the resident checkpoint proteins to initiate a signal that is amplified throughout the cell that ultimately prevents the activation of the proteolytic process that is required for sister chromatid separation and the onset of anaphase.

Kinetochores of unaligned chromosomes differ from those of aligned chromosomes in two ways. Kinetochores of aligned chromosomes are saturated with between 20 to 30 microtubules. In addition, poleward directed forces exerted at each sister kinetochore generates tension between them. Unaligned kinetochores on the other hand, are not saturated with microtubules and are not under tension. The mitotic checkpoint detects the presence of unattached kinetochores rather than monitoring for the presence of attached kinetochores. Consequently, unattached kinetochores emit an inhibitory signal that inhibits the biochemical events that are required to initiate the onset of anaphase. The mechanism by which this inhibitory signal is generated at unattached kinetochores has not precisely been determined but the signal is generated as a result of the lack of microtubule occupancy and kinetochore tension.

A single unattached kinetochore is capable of preventing cells from exiting mitosis. The mitotic checkpoint provides a way for a localized defect to affect the global biochemical status of the cell. In principle, the signal that is generated at an unattached kinetochore diffuses throughout the cell to affect its target. There are currently two models for how this is achieved. One model is based on the observation that the Mad2 checkpoint protein binds and is rapidly released from unattached kinetochores. The kinetochore is believed to act as a catalyst that converts Mad2 into an inhibitory state that diffuses throughout the cell upon its release from the kinetochore. A second model proposes that the signal is amplified by a kinase cascade much like a conventional signal transduction pathway. This kinase cascade is believed to be comprised of the checkpoint kinases, hBUBR1, hBUB1, hMPS1.

## References

Chan GK & Yen TJ (2003). The mitotic checkpoint: a signaling pathway that allows a single unattached kinetochore to inhibit mitotic exit. *Prog Cell Cycle Res*, 5, 431-9. [↗](#)

Musacchio A & Hardwick KG (2002). The spindle checkpoint: structural insights into dynamic signalling. *Nat Rev Mol Cell Biol*, 3, 731-41. [↗](#)

## Edit history

| Date       | Action   | Author    |
|------------|----------|-----------|
| 2004-05-05 | Authored | Yen TJ    |
| 2004-05-05 | Created  | Yen TJ    |
| 2021-05-22 | Modified | Shorser S |

## Entities found in this pathway (42)

| Input   | UniProt Id | Input   | UniProt Id | Input | UniProt Id     |
|---------|------------|---------|------------|-------|----------------|
| ANAPC11 | Q9NYG5     | ANAPC15 | P60006     | AURKA | Q96GD4         |
| AURKB   | Q96GD4     | BIRC5   | O15392     | BUB1  | O43683, O60566 |
| BUB1B   | O60566     | CDC20   | Q12834     | CDCA8 | Q53HL2         |
| CENPA   | P49450     | CENPE   | Q02224     | CENPF | P49454         |
| CENPH   | Q9H3R5     | CENPK   | Q9BS16     | CENPL | Q8N0S6         |

| Input  | UniProt Id | Input  | UniProt Id | Input  | UniProt Id |
|--------|------------|--------|------------|--------|------------|
| CENPM  | Q9NSP4     | CENPN  | Q96H22     | CENPO  | Q9BU64     |
| CENPU  | Q71F23     | DSN1   | Q9H410     | ERCC6L | Q2NKX8     |
| INCENP | Q9NQS7     | KIF18A | Q8NI77     | KIF2C  | Q99661     |
| MAD2L1 | Q13257     | NDC80  | O14777     | NUDC   | Q9Y266     |
| NUF2   | Q9BZD4     | NUP37  | Q8NFB4     | NUP85  | Q9BW27     |
| PLK1   | P53350     | RANBP2 | P49792     | RCC2   | Q9P258     |
| SGO1   | Q5FBB7     | SGO2   | Q562F6     | SKA1   | Q96BD8     |
| SKA2   | Q8WVK7     | SPC24  | Q8NBT2     | SPC25  | Q9HBM1     |
| UBE2C  | O00762     | UBE2S  | Q16763     | ZWINT  | O95229     |

## 5. G2/M Checkpoints (R-HSA-69481)

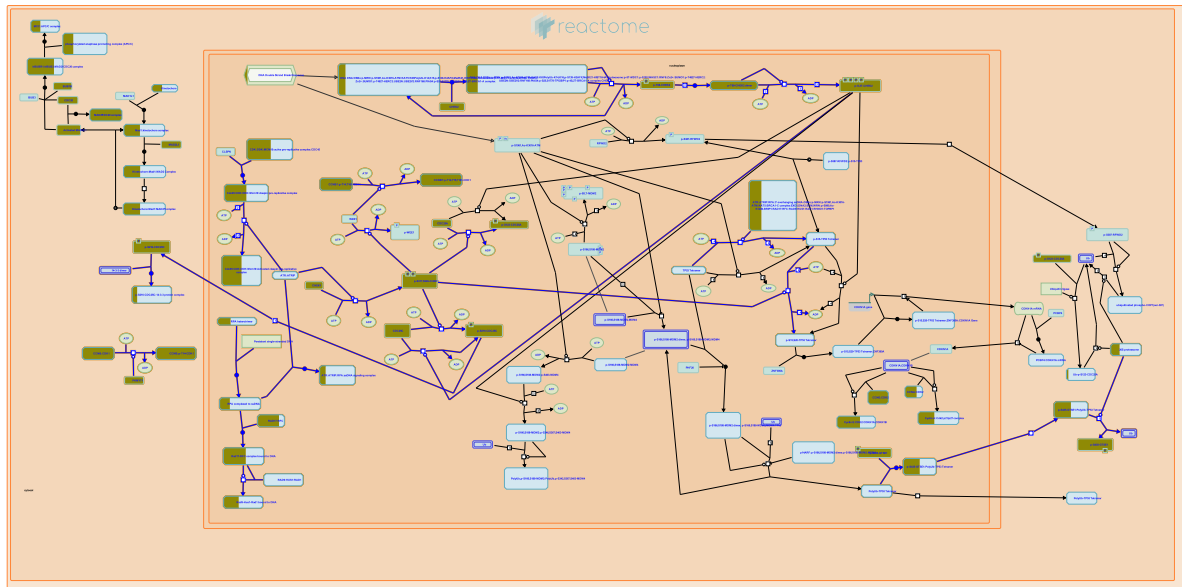

G2/M checkpoints include the checks for damaged DNA, unreplicated DNA, and checks that ensure that the genome is replicated once and only once per cell cycle. If cells pass these checkpoints, they follow normal transition to the M phase. However, if any of these checkpoints fail, mitotic entry is prevented by specific G2/M checkpoint events.

The G2/M checkpoints can fail due to the presence of unreplicated DNA or damaged DNA. In such instances, the cyclin-dependent kinase, Cdc2(Cdk1), is maintained in its inactive, phosphorylated state, and mitotic entry is prevented. Events that ensure that origins of DNA replication fire once and only once per cell cycle are also an example of a G2/M checkpoint.

In the event of high levels of DNA damage, the cells may also be directed to undergo apoptosis (not covered).

### References

### Edit history

| Date       | Action   | Author                  |
|------------|----------|-------------------------|
| 2003-06-05 | Created  | Walworth N, O'Donnell M |
| 2021-05-22 | Modified | Shorser S               |

### Entities found in this pathway (42)

| Input  | UniProt Id     | Input     | UniProt Id     | Input  | UniProt Id |
|--------|----------------|-----------|----------------|--------|------------|
| BLM    | P54132         | BRIP1     | Q9BX63         | CCNB1  | P14635     |
| CCNB2  | O95067         | CDC25A    | P30304         | CDC25C | P30307     |
| CDC45  | O75419         | CDC6      | Q99741         | CDK1   | P06493     |
| CDK2   | P24941         | CHEK1     | O14757         | CHEK2  | O96017     |
| DBF4   | Q9UBU7         | EXO1      | Q9UQ84         | GTSE1  | Q9NYZ3     |
| H2AFX  | P16104         | HIST1H2BH | P62807, Q93079 | MCM10  | Q7L590     |
| MCM2   | P33993, P49736 | MCM5      | P33992         | MCM6   | Q14566     |
| MCM7   | P33993         | ORC1      | Q13415         | ORC6   | Q9Y5N6     |
| PKMYT1 | Q99640         | PSMA2     | P25787         | PSMA4  | P25789     |

| Input | UniProt Id     | Input | UniProt Id     | Input  | UniProt Id     |
|-------|----------------|-------|----------------|--------|----------------|
| PSMA6 | P60900         | PSMB3 | P49720         | PSMB4  | P28070         |
| PSMB7 | P40306, Q99436 | PSMC1 | P62191         | PSMC3  | P17980         |
| PSMC4 | P43686         | PSMC5 | P62195         | PSMD12 | O00232         |
| PSMD3 | O43242         | RFC2  | P35249, P35250 | RFC4   | P35249, P35250 |
| RFC5  | P40937, P40938 | RMI2  | Q96E14         | RPA3   | P35244         |

## 6. G1/S Transition (R-HSA-69206)

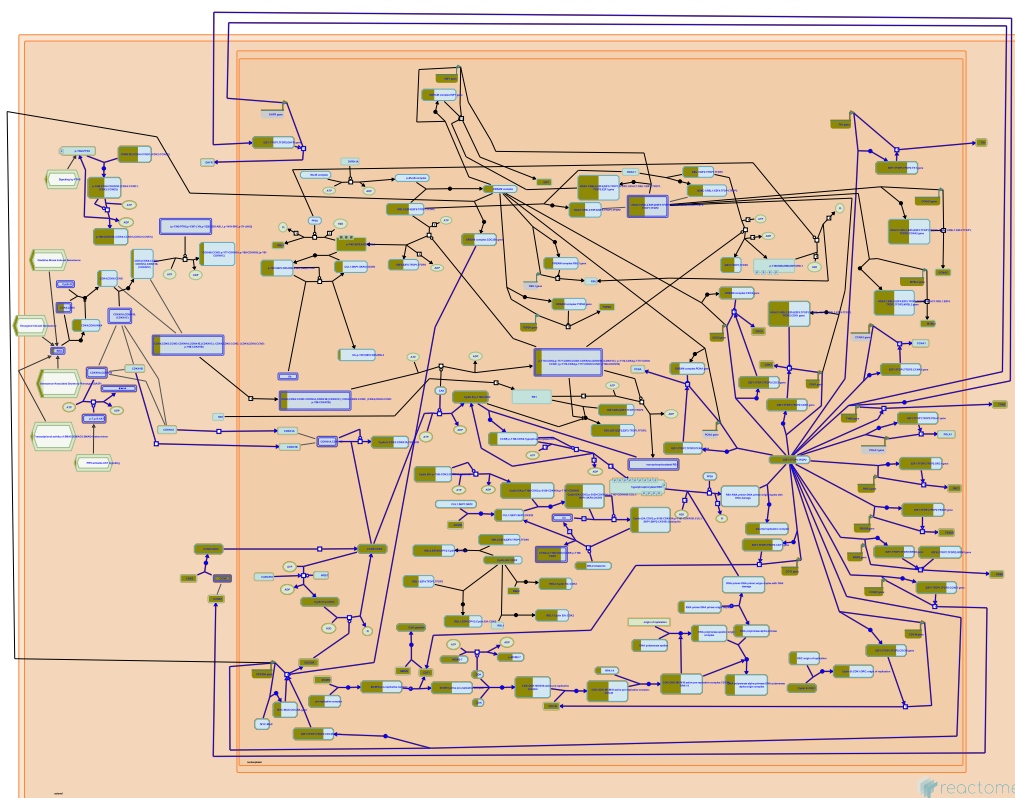

Cyclin E - Cdk2 complexes control the transition from G1 into S-phase. In this case, the binding of p21Cip1/Waf1 or p27kip1 is inhibitory. Important substrates for Cyclin E - Cdk2 complexes include proteins involved in the initiation of DNA replication. The two Cyclin E proteins are subjected to ubiquitin-dependent proteolysis, under the control of an E3 ubiquitin ligase known as the SCF. Cyclin A - Cdk2 complexes, which are also regulated by p21Cip1/Waf1 and p27kip1, are likely to be important for continued DNA synthesis, and progression into G2. An additional level of control of Cdk2 is reversible phosphorylation of Threonine-14 (T14) and Tyrosine-15 (Y15), catalyzed by the Wee1 and Myt1 kinases, and dephosphorylation by the three Cdc25 phosphatases, Cdc25A, B and C.

### References

### Edit history

| Date       | Action   | Author                  |
|------------|----------|-------------------------|
| 2003-06-05 | Created  | Walworth N, O'Donnell M |
| 2021-05-22 | Modified | Shorsler S              |

### Entities found in this pathway (44)

| Input | UniProt Id     | Input  | UniProt Id     | Input | UniProt Id |
|-------|----------------|--------|----------------|-------|------------|
| CCNA2 | P20248         | CCNB1  | P14635         | CCNE1 | P24864     |
| CCNE2 | O96020         | CDC25A | P30304         | CDC45 | O75419     |
| CDC6  | Q99741         | CDK1   | P06493, P24941 | CDK2  | P24941     |
| CDK4  | P11802         | CDT1   | Q9H211         | CKS1B | P61024     |
| DBF4  | Q9UBU7         | E2F1   | Q01094         | E2F2  | Q16254     |
| FBXO5 | Q9UKT4         | GMNN   | O75496         | MCM10 | Q7L590     |
| MCM2  | P33993, P49736 | MCM5   | P33992         | MCM6  | Q14566     |

| Input  | UniProt Id | Input | UniProt Id     | Input | UniProt Id |
|--------|------------|-------|----------------|-------|------------|
| MCM7   | P33993     | ORC1  | Q13415         | ORC6  | Q9Y5N6     |
| POLA2  | Q14181     | POLE2 | P56282         | PSMA2 | P25787     |
| PSMA4  | P25789     | PSMA6 | P60900         | PSMB3 | P49720     |
| PSMB4  | P28070     | PSMB7 | P40306, Q99436 | PSMC1 | P62191     |
| PSMC3  | P17980     | PSMC4 | P43686         | PSMC5 | P62195     |
| PSMD12 | O00232     | PSMD3 | O43242         | RBL2  | Q08999     |
| RPA3   | P35244     | RRM2  | P31350         | TFDP1 | Q14186     |
| TK1    | P04183     | TYMS  | P04818         |       |            |

| Input | Ensembl Id      | Input  | Ensembl Id      | Input | Ensembl Id      |
|-------|-----------------|--------|-----------------|-------|-----------------|
| CCNE1 | ENSG00000105173 | CDC25A | ENSG00000164045 | CDC45 | ENSG00000093009 |
| CDC6  | ENSG00000094804 | CDK1   | ENSG00000170312 | CDT1  | ENSG00000167513 |
| FBXO5 | ENSG00000112029 | ORC1   | ENSG00000085840 | RRM2  | ENSG00000171848 |
| TK1   | ENSG00000167900 | TYMS   | ENSG00000176890 |       |                 |

## 7. Mitotic G1 phase and G1/S transition (R-HSA-453279)

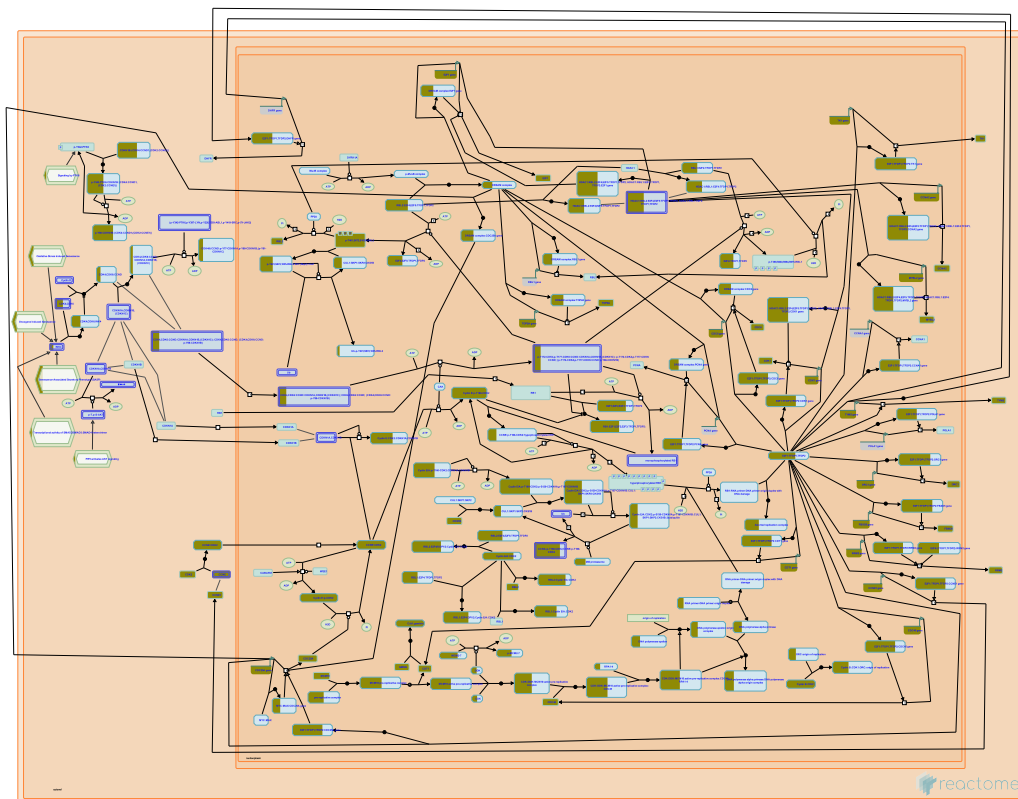

Mitotic G1-G1/S phase involves G1 phase of the mitotic interphase and G1/S transition, when a cell commits to DNA replication and division genetic and cellular material to two daughter cells.

During early G1, cells can enter a quiescent G0 state. In quiescent cells, the evolutionarily conserved DREAM complex, consisting of the pocket protein family member p130 (RBL2), bound to E2F4 or E2F5, and the MuvB complex, represses transcription of cell cycle genes (reviewed by Sadasivam and DeCaprio 2013).

During early G1 phase in actively cycling cells, transcription of cell cycle genes is repressed by another pocket protein family member, p107 (RBL1), which forms a complex with E2F4 (Ferreira et al. 1998, Cobrinik 2005). RB1 tumor suppressor, the product of the retinoblastoma susceptibility gene, is the third member of the pocket protein family. RB1 binds to E2F transcription factors E2F1, E2F2 and E2F3 and inhibits their transcriptional activity, resulting in prevention of G1/S transition (Chellappan et al. 1991, Bagchi et al. 1991, Chittenden et al. 1991, Lees et al. 1993, Hiebert 1993, Wu et al. 2001). Once RB1 is phosphorylated on serine residue S795 by Cyclin D:CDK4/6 complexes, it can no longer associate with and inhibit E2F1-3. Thus, CDK4/6-mediated phosphorylation of RB1 leads to transcriptional activation of E2F1-3 target genes needed for the S phase of the cell cycle (Connell-Crowley et al. 1997). CDK2, in complex with cyclin E, contributes to RB1 inactivation and also activates proteins needed for the initiation of DNA replication (Zhang 2007). Expression of D type cyclins is regulated by extracellular mitogens (Cheng et al. 1998, Depoortere et al. 1998). Catalytic activities of CDK4/6 and CDK2 are controlled by CDK inhibitors of the INK4 family (Serrano et al. 1993, Hannon and Beach 1994, Guan et al. 1994, Guan et al. 1996, Parry et al. 1995) and the Cip/Kip family, respectively.

### References

Cobrinik D (2005). Pocket proteins and cell cycle control. *Oncogene*, 24, 2796-809. [🔗](#)

Sadasivam S & DeCaprio JA (2013). The DREAM complex: master coordinator of cell cycle-dependent gene expression. *Nat. Rev. Cancer*, 13, 585-95. [↗](#)

Ferreira R, Magnaghi-Jaulin L, Robin P, Harel-Bellan A & Trouche D (1998). The three members of the pocket proteins family share the ability to repress E2F activity through recruitment of a histone deacetylase. *Proc Natl Acad Sci U S A*, 95, 10493-8. [↗](#)

Connell-Crowley L, Harper JW & Goodrich DW (1997). Cyclin D1/Cdk4 regulates retinoblastoma protein-mediated cell cycle arrest by site-specific phosphorylation. *Mol Biol Cell*, 8, 287-301. [↗](#)

Chellappan SP, Hiebert S, Mudryj M, Horowitz JM & Nevins JR (1991). The E2F transcription factor is a cellular target for the RB protein. *Cell*, 65, 1053-61. [↗](#)

## Edit history

| Date       | Action   | Author          |
|------------|----------|-----------------|
| 2010-01-19 | Edited   | Matthews L      |
| 2010-01-20 | Authored | Matthews L      |
| 2010-01-20 | Created  | Matthews L      |
| 2011-06-15 | Reviewed | Grana X         |
| 2011-08-25 | Reviewed | MacPherson D    |
| 2011-08-26 | Revised  | Orlic-Milacic M |
| 2011-08-26 | Authored | Orlic-Milacic M |
| 2017-02-08 | Edited   | Orlic-Milacic M |
| 2018-07-10 | Reviewed | Manfredi JJ     |
| 2021-05-22 | Modified | Shorser S       |

## Entities found in this pathway (47)

| Input | UniProt Id     | Input  | UniProt Id     | Input  | UniProt Id     |
|-------|----------------|--------|----------------|--------|----------------|
| CCNA2 | P20248         | CCNB1  | P14635         | CCNE1  | P24864         |
| CCNE2 | O96020         | CDC25A | P30304         | CDC45  | O75419         |
| CDC6  | Q99741         | CDK1   | P06493, P24941 | CDK2   | P24941         |
| CDK4  | P11802         | CDKN2D | P55273         | CDT1   | Q9H211         |
| CKS1B | P61024         | DBF4   | Q9UBU7         | E2F1   | O00716, Q01094 |
| E2F2  | Q14209, Q16254 | FBXO5  | Q9UKT4         | GMNN   | O75496         |
| MCM10 | Q7L590         | MCM2   | P33993, P49736 | MCM5   | P33992         |
| MCM6  | Q14566         | MCM7   | P33993         | MYBL2  | P10244         |
| ORC1  | Q13415         | ORC6   | Q9Y5N6         | POLA2  | Q14181         |
| POLE2 | P56282         | PSMA2  | P25787         | PSMA4  | P25789         |
| PSMA6 | P60900         | PSMB3  | P49720         | PSMB4  | P28070         |
| PSMB7 | P40306, Q99436 | PSMC1  | P62191         | PSMC3  | P17980         |
| PSMC4 | P43686         | PSMC5  | P62195         | PSMD12 | O00232         |
| PSMD3 | O43242         | RBL2   | Q08999         | RPA3   | P35244         |
| RRM2  | P31350         | TFDP1  | Q14186         | TK1    | P04183         |
| TOP2A | P11388         | TYMS   | P04818         |        |                |

| Input | Ensembl Id      | Input | Ensembl Id      | Input  | Ensembl Id      |
|-------|-----------------|-------|-----------------|--------|-----------------|
| CCNA2 | ENSG00000145386 | CCNE1 | ENSG00000105173 | CDC25A | ENSG00000164045 |
| CDC45 | ENSG00000093009 | CDC6  | ENSG00000094804 | CDK1   | ENSG00000170312 |
| CDT1  | ENSG00000167513 | E2F1  | ENSG00000101412 | FBXO5  | ENSG00000112029 |
| MYBL2 | ENSG00000101057 | ORC1  | ENSG00000085840 | RRM2   | ENSG00000171848 |
| TK1   | ENSG00000167900 | TOP2A | ENSG00000131747 | TYMS   | ENSG00000176890 |

## 8. Synthesis of DNA (R-HSA-69239)

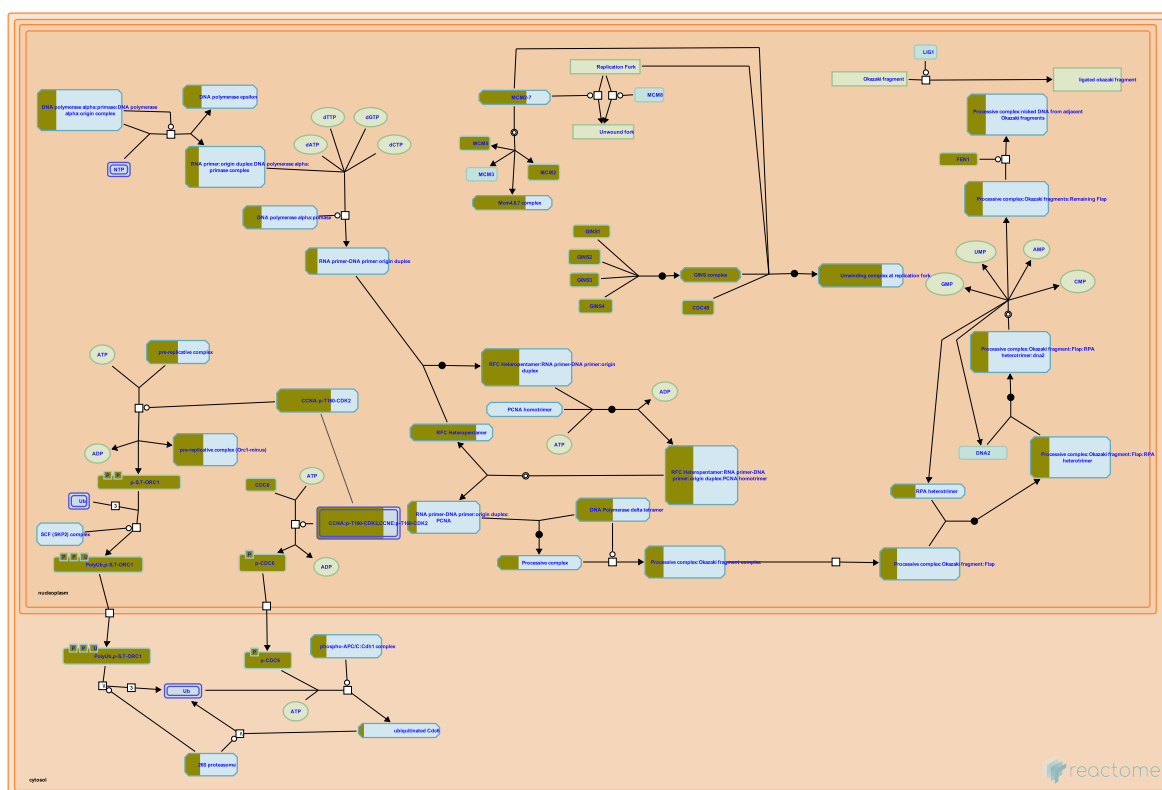

**Cellular compartments:** nucleoplasm, cytosol.

The actual synthesis of DNA occurs in the S phase of the cell cycle. This includes the initiation of DNA replication, when the first nucleotide of the new strand is laid down during the synthesis of the primer. The DNA replication preinitiation events begin in late M or early G1 phase.

### References

### Edit history

| Date       | Action   | Author    |
|------------|----------|-----------|
| 2021-05-22 | Modified | Shorser S |

### Entities found in this pathway (43)

| Input   | UniProt Id     | Input   | UniProt Id | Input  | UniProt Id |
|---------|----------------|---------|------------|--------|------------|
| ANAPC11 | Q9NYG5         | ANAPC15 | P60006     | CCNA2  | P20248     |
| CCNE1   | P24864         | CCNE2   | O96020     | CDC45  | O75419     |
| CDC6    | Q99741         | CDK1    | P24941     | CDK2   | P24941     |
| CDT1    | Q9H211         | FEN1    | P39748     | GINS1  | Q14691     |
| GINS2   | Q9Y248         | GINS3   | Q9BRX5     | GINS4  | Q9BRT9     |
| MCM2    | P33993, P49736 | MCM5    | P33992     | MCM6   | Q14566     |
| MCM7    | P33993         | ORC1    | Q13415     | ORC6   | Q9Y5N6     |
| POLA2   | Q14181         | POLD1   | P28340     | POLD2  | P49005     |
| POLE2   | P56282         | PSMA2   | P25787     | PSMA4  | P25789     |
| PSMA6   | P60900         | PSMB3   | P49720     | PSMB4  | P28070     |
| PSMB7   | P40306, Q99436 | PSMC1   | P62191     | PSMC3  | P17980     |
| PSMC4   | P43686         | PSMC5   | P62195     | PSMD12 | O00232     |

| Input | UniProt Id     | Input | UniProt Id     | Input | UniProt Id     |
|-------|----------------|-------|----------------|-------|----------------|
| PSMD3 | O43242         | RFC2  | P35249, P35250 | RFC4  | P35249, P35250 |
| RFC5  | P40937, P40938 | RPA3  | P35244         | UBE2C | O00762         |
| UBE2S | Q16763         |       |                |       |                |

## 9. Chromosome Maintenance (R-HSA-73886)

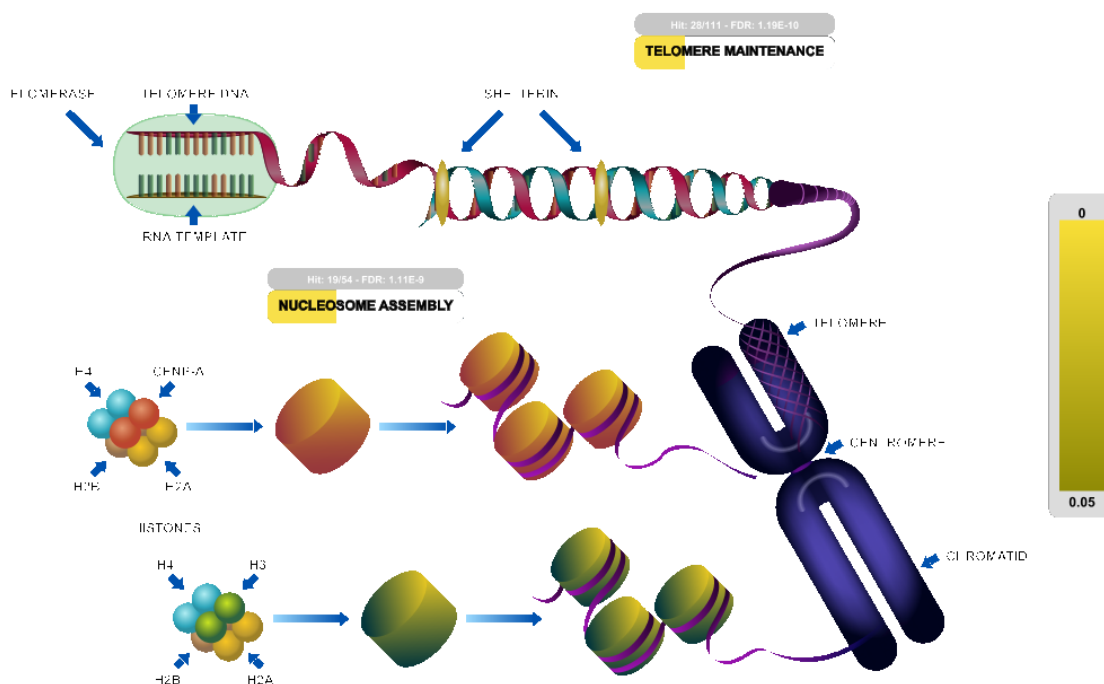

**Cellular compartments:** nucleoplasm, nuclear envelope.

Maintenance of chromosomal organization is critical for stable chromosome function. Two aspects of maintenance annotated in Reactome are centromeric chromatin assembly outside the context of DNA replication, involving **nucleosome assembly** with the histone H3 variant CenH3 (also called CENP-A), and the **maintenance of telomeres**, protein-DNA complexes at the ends of linear chromosomes that are important for genome stability.

### References

### Edit history

| Date       | Action   | Author       |
|------------|----------|--------------|
| 2005-01-01 | Created  | Joshi-Tope G |
| 2021-05-18 | Edited   | Joshi-Tope G |
| 2021-05-18 | Authored | Gillespie ME |
| 2021-05-22 | Modified | Shorser S    |

### Entities found in this pathway (40)

| Input     | UniProt Id | Input     | UniProt Id     | Input     | UniProt Id |
|-----------|------------|-----------|----------------|-----------|------------|
| BLM       | P54132     | CCNA2     | P20248         | CDK1      | P24941     |
| CDK2      | P24941     | CENPA     | P49450         | CENPH     | Q9H3R5     |
| CENPK     | Q9BS16     | CENPL     | Q8N0S6         | CENPM     | Q9NSP4     |
| CENPN     | Q96H22     | CENPO     | Q9BU64         | CENPU     | Q71F23     |
| CENPW     | Q5EE01     | CENPX     | A8MT69         | DSCC1     | Q9BVC3     |
| FEN1      | P39748     | H2AFX     | P16104         | H2AFZ     | P0C0S5     |
| HIST1H2AJ | Q99878     | HIST1H2BH | P62807, Q93079 | HIST2H2AC | Q16777     |

| Input  | UniProt Id     | Input  | UniProt Id     | Input  | UniProt Id     |
|--------|----------------|--------|----------------|--------|----------------|
| HJURP  | Q8NCD3         | MIS18A | Q9NYP9         | NHP2   | Q9NX24         |
| OIP5   | O43482         | PIF1   | Q9H611         | POLA2  | Q14181         |
| POLD1  | P28340         | POLD2  | P49005         | POLR2D | O15514         |
| POLR2F | P61218         | POLR2I | P36954         | POLR2J | P52435         |
| RAD54L | P46100         | RFC2   | P35249, P35250 | RFC4   | P35249, P35250 |
| RFC5   | P40937, P40938 | RPA3   | P35244         | RUVBL2 | Q9Y230         |
| WRAP53 | Q9BUR4         |        |                |        |                |

## 10. DNA Replication (R-HSA-69306)

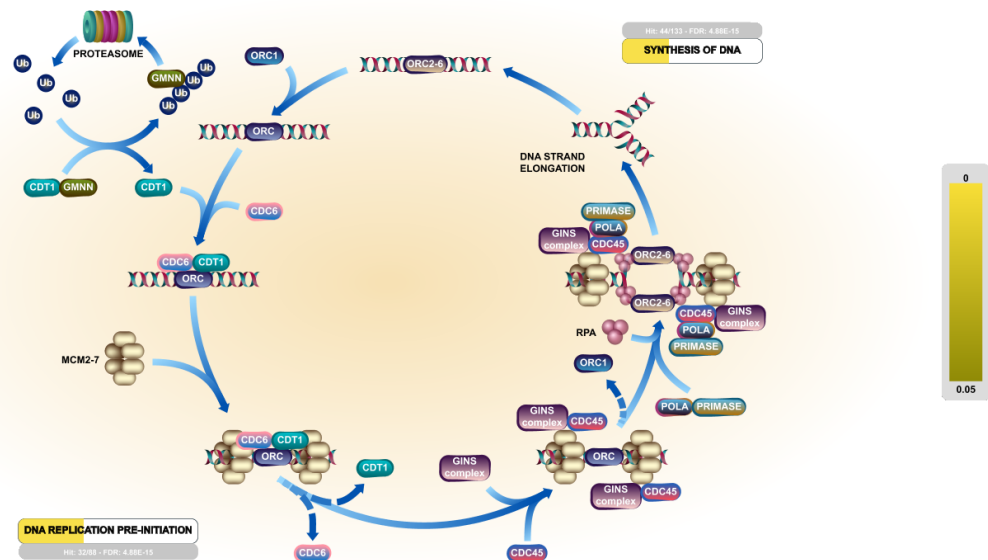

**Cellular compartments:** nucleoplasm, cytosol.

Studies in the past decade have suggested that the basic mechanism of DNA replication initiation is conserved in all kingdoms of life. Initiation in unicellular eukaryotes, in particular *Saccharomyces cerevisiae* (budding yeast), is well understood, and has served as a model for studies of DNA replication initiation in multicellular eukaryotes, including humans. In general terms, the first step of initiation is the binding of the replication initiator to the origin of replication. The replicative helicase is then assembled onto the origin, usually by a helicase assembly factor. Either shortly before or shortly after helicase assembly, some local unwinding of the origin of replication occurs in a region rich in adenine and thymine bases (often termed a DNA unwinding element, DUE). The unwound region provides the substrate for primer synthesis and initiation of DNA replication. The best-defined eukaryotic origins are those of *S. cerevisiae*, which have well-conserved sequence elements for initiator binding, DNA unwinding and binding of accessory proteins. In multicellular eukaryotes, unlike *S. cerevisiae*, these loci appear not to be defined by the presence of a DNA sequence motif. Indeed, choice of replication origins in a multicellular eukaryote may vary with developmental stage and tissue type. In cell-free models of metazoan DNA replication, such as the one provided by *Xenopus* egg extracts, there are only limited DNA sequence specificity requirements for replication initiation (Kelly & Brown 2000; Bell & Dutta 2002; Marahrens & Stillman 1992; Cimbora & Groudine 2001; Mahbubani et al 1992, Hyrien & Mechali 1993).

### References

- Marahrens Y & Stillman B (1992). A yeast chromosomal origin of DNA replication defined by multiple functional elements. *Science*, 255, 817-23. [↗](#)
- Hyrien O & Méchali M (1993). Chromosomal replication initiates and terminates at random sequences but at regular intervals in the ribosomal DNA of *Xenopus* early embryos. *EMBO J*, 12, 4511-20. [↗](#)
- Bell SP & Dutta A (2002). DNA replication in eukaryotic cells. *Annu Rev Biochem*, 71, 333-74. [↗](#)
- Mahbubani HM, Paull T, Elder JK & Blow JJ (1992). DNA replication initiates at multiple sites on plasmid DNA in *Xenopus* egg extracts. *Nucleic Acids Res*, 20, 1457-62. [↗](#)

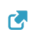

## Edit history

| Date       | Action   | Author                                                       |
|------------|----------|--------------------------------------------------------------|
| 2003-01-06 | Authored | Catlett M, Davey MJ, Tye BK, O'Donnell M, Forsburg SL et al. |
| 2003-01-06 | Created  | Catlett M, Davey MJ, Tye BK, O'Donnell M, Forsburg SL et al. |
| 2005-09-07 | Revised  | Tye BK, Borowiec JA, Mendez J, Aladjem M                     |
| 2021-05-18 | Edited   | Joshi-Tope G, Nickerson E, D'Eustachio P                     |
| 2021-05-18 | Reviewed | Mendez J, Aladjem M                                          |
| 2021-05-22 | Modified | Shorser S                                                    |

## Entities found in this pathway (48)

| Input   | UniProt Id     | Input   | UniProt Id     | Input | UniProt Id     |
|---------|----------------|---------|----------------|-------|----------------|
| ANAPC11 | Q9NYG5         | ANAPC15 | P60006         | CCNA2 | P20248         |
| CCNE1   | P24864         | CCNE2   | O96020         | CDC45 | O75419         |
| CDC6    | Q99741         | CDK1    | P24941         | CDK2  | P24941         |
| CDT1    | Q9H211         | DBF4    | Q9UBU7         | E2F1  | O00716, Q01094 |
| E2F2    | Q14209         | FEN1    | P39748         | GINS1 | Q14691         |
| GINS2   | Q9Y248         | GINS3   | Q9BRX5         | GINS4 | Q9BRT9         |
| GMNN    | O75496         | MCM10   | Q7L590         | MCM2  | P33993, P49736 |
| MCM5    | P33992         | MCM6    | Q14566         | MCM7  | P33993         |
| ORC1    | Q13415         | ORC6    | Q9Y5N6         | POLA2 | Q14181         |
| POLD1   | P28340         | POLD2   | P49005         | POLE2 | P56282         |
| PSMA2   | P25787         | PSMA4   | P25789         | PSMA6 | P60900         |
| PSMB3   | P49720         | PSMB4   | P28070         | PSMB7 | P40306, Q99436 |
| PSMC1   | P62191         | PSMC3   | P17980         | PSMC4 | P43686         |
| PSMC5   | P62195         | PSMD12  | O00232         | PSMD3 | O43242         |
| RFC2    | P35249, P35250 | RFC4    | P35249, P35250 | RFC5  | P40937, P40938 |
| RPA3    | P35244         | UBE2C   | O00762         | UBE2S | Q16763         |

## 11. Resolution of Sister Chromatid Cohesion (R-HSA-2500257)

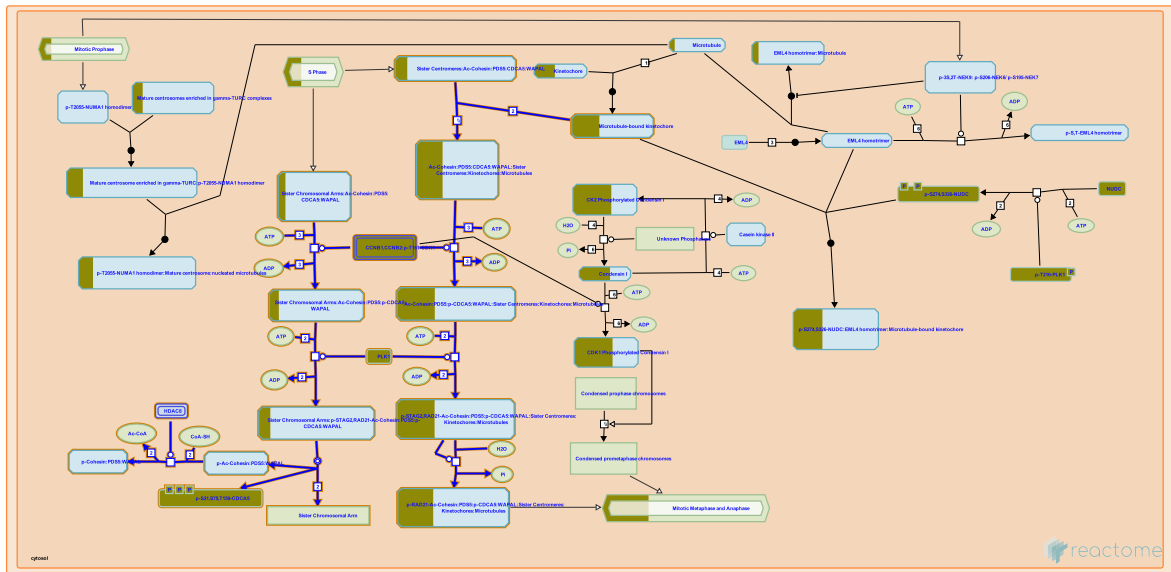

**Cellular compartments:** cytosol, chromosome, chromosome, centromeric region.

The resolution of sister chromatids in mitotic prometaphase involves removal of cohesin complexes from chromosomal arms, with preservation of cohesion at centromeres (Losada et al. 1998, Hauf et al. 2001, Hauf et al. 2005).

CDK1-mediated phosphorylation of cohesin-bound CDCA5 (Sororin) at threonine T159 provides a docking site for PLK1, enabling PLK1-mediated phosphorylation of cohesin subunits STAG2 (SA2) and RAD21 (Hauf et al. 2005, Dreier et al. 2011, Zhang et al. 2011). Further phosphorylation of CDCA5 by CDK1 results in dissociation of CDCA5 from cohesin complex, which restores the activity of WAPAL in removing STAG2-phosphorylated cohesin from chromosomal arms (Hauf et al. 2005, Gandhi et al. 2006, Kueng et al. 2006, Shintomi and Hirano 2006, Nishiyama et al. 2010, Zhang et al. 2011).

At centromeres, kinetochore proteins shugoshins (SGOL1 and SGOL2) enable PP2A-B56 (also a kinetochore constituent) to dephosphorylate the STAG2 subunit of centromeric cohesin. Dephosphorylation of STAG2 enables maintenance of centromeric cohesion, thus preventing separation of sister chromatids until anaphase (Salic et al. 2004, Kitajima et al. 2004, Kitajima et al. 2005, Kitajima et al. 2006).

### References

- Losada A, Hirano M & Hirano T (1998). Identification of Xenopus SMC protein complexes required for sister chromatid cohesion. *Genes Dev.*, 12, 1986-97. [↗](#)
- Hauf S, Waizenegger IC & Peters JM (2001). Cohesin cleavage by separase required for anaphase and cytokinesis in human cells. *Science*, 293, 1320-3. [↗](#)
- Hauf S, Roitinger E, Koch B, Dittrich CM, Mechtler K & Peters JM (2005). Dissociation of cohesin from chromosome arms and loss of arm cohesion during early mitosis depends on phosphorylation of SA2. *PLoS Biol*, 3, e69. [↗](#)
- Kitajima TS, Hauf S, Ohsugi M, Yamamoto T & Watanabe Y (2005). Human Bub1 defines the persistent cohesion site along the mitotic chromosome by affecting Shugoshin localization. *Curr. Biol.*, 15, 353-9. [↗](#)

Kitajima TS, Sakuno T, Ishiguro K, Iemura S, Natsume T, Kawashima SA & Watanabe Y (2006).  
 Shugoshin collaborates with protein phosphatase 2A to protect cohesin. *Nature*, 441, 46-52. [↗](#)

### Edit history

| Date       | Action   | Author                   |
|------------|----------|--------------------------|
| 2012-10-01 | Created  | Orlic-Milacic M          |
| 2012-10-02 | Authored | Orlic-Milacic M          |
| 2012-10-05 | Edited   | Matthews L, Gillespie ME |
| 2012-10-22 | Reviewed | Zhang N                  |
| 2012-11-20 | Reviewed | Tanno Y, Watanabe Y      |
| 2021-05-22 | Modified | Shorser S                |

### Entities found in this pathway (44)

| Input  | UniProt Id     | Input  | UniProt Id | Input  | UniProt Id |
|--------|----------------|--------|------------|--------|------------|
| AURKA  | Q96GD4         | AURKB  | Q96GD4     | BIRC5  | O15392     |
| BUB1   | O43683, O60566 | BUB1B  | O60566     | CCNB1  | P14635     |
| CCNB2  | O95067         | CDC20  | Q12834     | CDCA5  | Q96FF9     |
| CDCA8  | Q53HL2         | CDK1   | P06493     | CENPA  | P49450     |
| CENPE  | Q02224         | CENPF  | P49454     | CENPH  | Q9H3R5     |
| CENPK  | Q9BS16         | CENPL  | Q8N0S6     | CENPM  | Q9NSP4     |
| CENPN  | Q96H22         | CENPO  | Q9BU64     | CENPU  | Q71F23     |
| DSN1   | Q9H410         | ERCC6L | Q2NXX8     | INCENP | Q9NQS7     |
| KIF18A | Q8NI77         | KIF2C  | Q99661     | MAD2L1 | Q13257     |
| NDC80  | O14777         | NUDC   | Q9Y266     | NUF2   | Q9BZD4     |
| NUP37  | Q8NFH4         | NUP85  | Q9BW27     | PLK1   | P53350     |
| RANBP2 | P49792         | RCC2   | Q9P258     | SGO1   | Q5FBB7     |
| SGO2   | Q562F6         | SKA1   | Q96BD8     | SKA2   | Q8WVK7     |
| SPC24  | Q8NBT2         | SPC25  | Q9HBM1     | TUBA1B | P68363     |
| TUBA1C | Q9BQE3         | ZWINT  | O95229     |        |            |

## 12. Separation of Sister Chromatids (R-HSA-2467813)

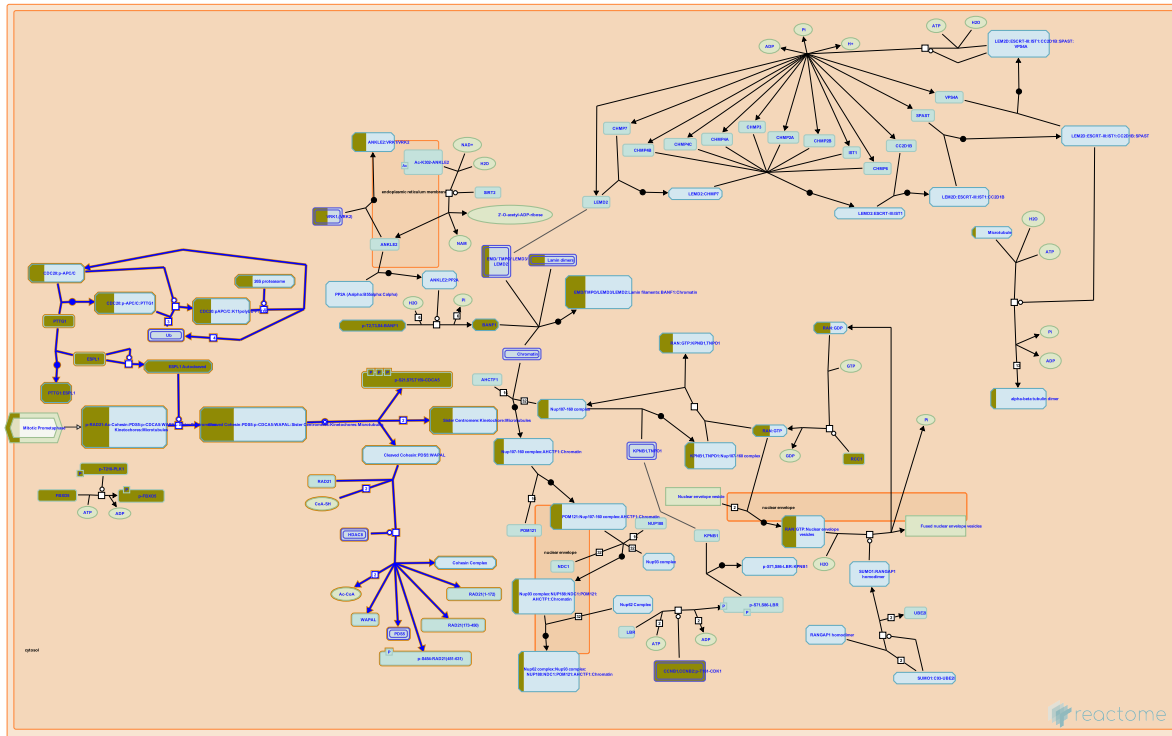

**Cellular compartments:** cytosol.

While sister chromatids resolve in prometaphase, separating along chromosomal arms, the cohesion of sister centromeres persists until anaphase. At the anaphase onset, the anaphase promoting complex/cyclosome (APC/C) ubiquitinates PTTG1 (securin), targeting it for degradation (Hagting et al. 2002). PTTG1 acts as an inhibitor of ESPL1 (known as separin i.e. separase). Hence, PTTG1 removal initiated by APC/C, enables ESPL1 to become catalytically active (Zou et al. 1999, Waizenegger et al. 2002). ESPL1 undergoes autolysis (Waizenegger et al. 2002) and also cleaves RAD21 subunit of centromeric cohesin (Hauf et al. 2001). RAD21 cleavage promotes dissociation of cohesin complexes from sister centromeres, leading to separation of sister chromatids. Subsequent movement of sister chromatids to opposite poles of the mitotic spindle segregates replicated chromosomes to two daughter cells (Waizenegger et al. 2000, Hauf et al. 2001, Waizenegger et al. 2002).

### References

- Hauf S, Waizenegger IC & Peters JM (2001). Cohesin cleavage by separase required for anaphase and cytokinesis in human cells. *Science*, 293, 1320-3. [↗](#)
- Hagting A, Den Elzen N, Vodermaier HC, Waizenegger IC, Peters JM & Pines J (2002). Human securin proteolysis is controlled by the spindle checkpoint and reveals when the APC/C switches from activation by Cdc20 to Cdh1. *J Cell Biol*, 157, 1125-37. [↗](#)
- Waizenegger I, Giménez-Abián JF, Wernic D & Peters JM (2002). Regulation of human separase by securin binding and autocleavage. *Curr. Biol.*, 12, 1368-78. [↗](#)
- Waizenegger IC, Hauf S, Meinke A & Peters JM (2000). Two distinct pathways remove mammalian cohesin from chromosome arms in prophase and from centromeres in anaphase. *Cell*, 103, 399-410. [↗](#)

Zou H, McGarry TJ, Bernal T & Kirschner MW (1999). Identification of a vertebrate sister-chromatid separation inhibitor involved in transformation and tumorigenesis. *Science*, 285, 418-22. [↗](#)

## Edit history

| Date       | Action   | Author                   |
|------------|----------|--------------------------|
| 2012-09-13 | Created  | Orlic-Milacic M          |
| 2012-10-02 | Authored | Orlic-Milacic M          |
| 2012-10-05 | Edited   | Matthews L, Gillespie ME |
| 2012-10-22 | Reviewed | Zhang N                  |
| 2012-11-20 | Reviewed | Tanno Y, Watanabe Y      |
| 2021-05-31 | Modified | Shorser S                |

## Entities found in this pathway (59)

| Input   | UniProt Id | Input   | UniProt Id | Input  | UniProt Id     |
|---------|------------|---------|------------|--------|----------------|
| ANAPC11 | Q9NYG5     | ANAPC15 | P60006     | AURKA  | Q96GD4         |
| AURKB   | Q96GD4     | BIRC5   | O15392     | BUB1   | O43683, O60566 |
| BUB1B   | O60566     | CDC20   | Q12834     | CDCA5  | Q96FF9         |
| CDCA8   | Q53HL2     | CENPA   | P49450     | CENPE  | Q02224         |
| CENPF   | P49454     | CENPH   | Q9H3R5     | CENPK  | Q9BS16         |
| CENPL   | Q8N0S6     | CENPM   | Q9NSP4     | CENPN  | Q96H22         |
| CENPO   | Q9BU64     | CENPU   | Q71F23     | DSN1   | Q9H410         |
| ERCC6L  | Q2NKX8     | ESPL1   | Q14674     | INCENP | Q9NQS7         |
| KIF18A  | Q8NI77     | KIF2C   | Q99661     | MAD2L1 | Q13257         |
| NDC80   | O14777     | NUDC    | Q9Y266     | NUF2   | Q9BZD4         |
| NUP37   | Q8NFB4     | NUP85   | Q9BW27     | PLK1   | P53350         |
| PSMA2   | P25787     | PSMA4   | P25789     | PSMA6  | P60900         |
| PSMB3   | P49720     | PSMB4   | P28070     | PSMB7  | P40306, Q99436 |
| PSMC1   | P62191     | PSMC3   | P17980     | PSMC4  | P43686         |
| PSMC5   | P62195     | PSMD12  | O00232     | PSMD3  | O43242         |
| PTTG1   | O95997     | RANBP2  | P49792     | RCC2   | Q9P258         |
| SGO1    | Q5FBB7     | SGO2    | Q562F6     | SKA1   | Q96BD8         |
| SKA2    | Q8WVK7     | SPC24   | Q8NBT2     | SPC25  | Q9HBM1         |
| TUBA1B  | P68363     | TUBA1C  | Q9BQE3     | UBE2C  | O00762         |
| UBE2S   | Q16763     | ZWINT   | O95229     |        |                |

### 13. S Phase (R-HSA-69242)

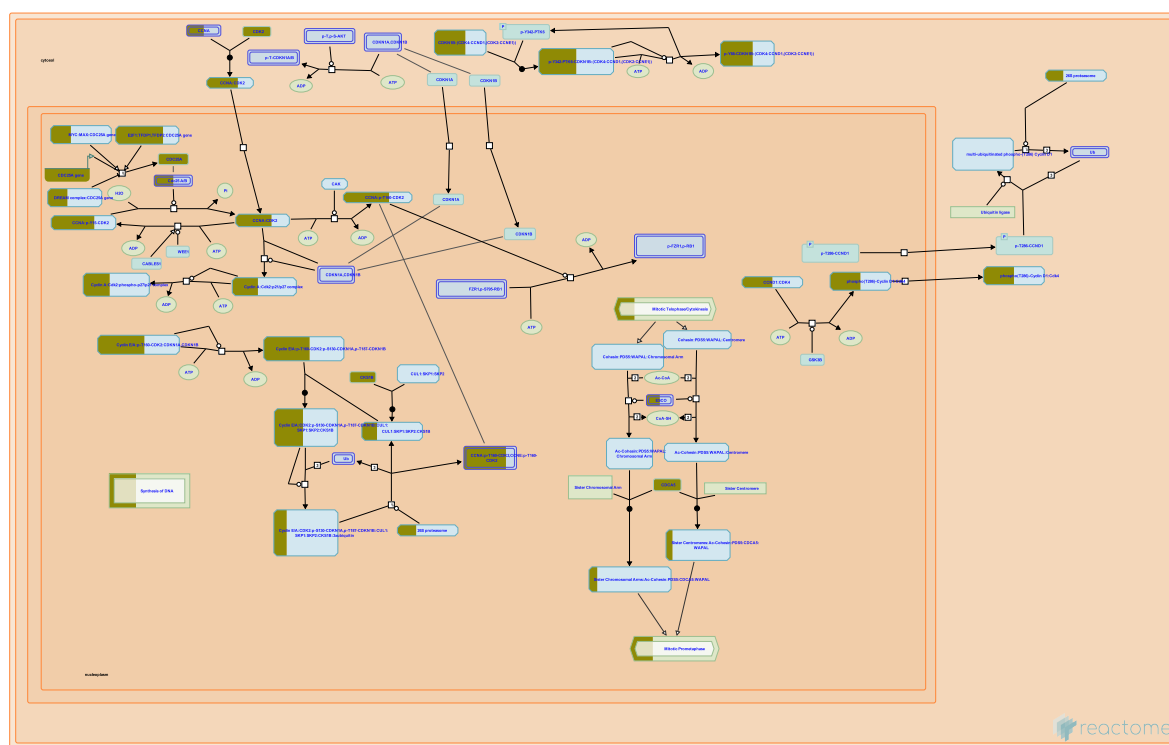

DNA synthesis occurs in the S phase, or the synthesis phase, of the cell cycle. The cell duplicates its hereditary material, and two copies of the chromosome are formed. As DNA replication continues, the E type cyclins shared by the G1 and S phases, are destroyed and the levels of the mitotic cyclins rise.

#### References

#### Edit history

| Date       | Action   | Author      |
|------------|----------|-------------|
| 2018-07-10 | Reviewed | Manfredi JJ |
| 2021-05-22 | Modified | Shorser S   |

#### Entities found in this pathway (52)

| Input   | UniProt Id | Input   | UniProt Id     | Input  | UniProt Id |
|---------|------------|---------|----------------|--------|------------|
| ANAPC11 | Q9NYG5     | ANAPC15 | P60006         | CCNA2  | P20248     |
| CCNE1   | P24864     | CCNE2   | O96020         | CDC25A | P30304     |
| CDC45   | O75419     | CDC6    | Q99741         | CDCA5  | Q96FF9     |
| CDK1    | P24941     | CDK2    | P24941         | CDK4   | P11802     |
| CDT1    | Q9H211     | CKS1B   | P61024         | E2F1   | Q01094     |
| E2F2    | Q16254     | ESCO2   | Q56NI9         | FEN1   | P39748     |
| GINS1   | Q14691     | GINS2   | Q9Y248         | GINS3  | Q9BRX5     |
| GINS4   | Q9BRT9     | MCM2    | P33993, P49736 | MCM5   | P33992     |
| MCM6    | Q14566     | MCM7    | P33993         | ORC1   | Q13415     |
| ORC6    | Q9Y5N6     | POLA2   | Q14181         | POLD1  | P28340     |
| POLD2   | P49005     | POLE2   | P56282         | PSMA2  | P25787     |
| PSMA4   | P25789     | PSMA6   | P60900         | PSMB3  | P49720     |

| Input  | UniProt Id     | Input | UniProt Id     | Input | UniProt Id     |
|--------|----------------|-------|----------------|-------|----------------|
| PSMB4  | P28070         | PSMB7 | P40306, Q99436 | PSMC1 | P62191         |
| PSMC3  | P17980         | PSMC4 | P43686         | PSMC5 | P62195         |
| PSMD12 | O00232         | PSMD3 | O43242         | RBL2  | Q08999         |
| RFC2   | P35249, P35250 | RFC4  | P35249, P35250 | RFC5  | P40937, P40938 |
| RPA3   | P35244         | TFDP1 | Q14186         | UBE2C | O00762         |
| UBE2S  | Q16763         |       |                |       |                |

| Input  | Ensembl Id      |
|--------|-----------------|
| CDC25A | ENSG00000164045 |

## 14. Cell Cycle, Mitotic (R-HSA-69278)

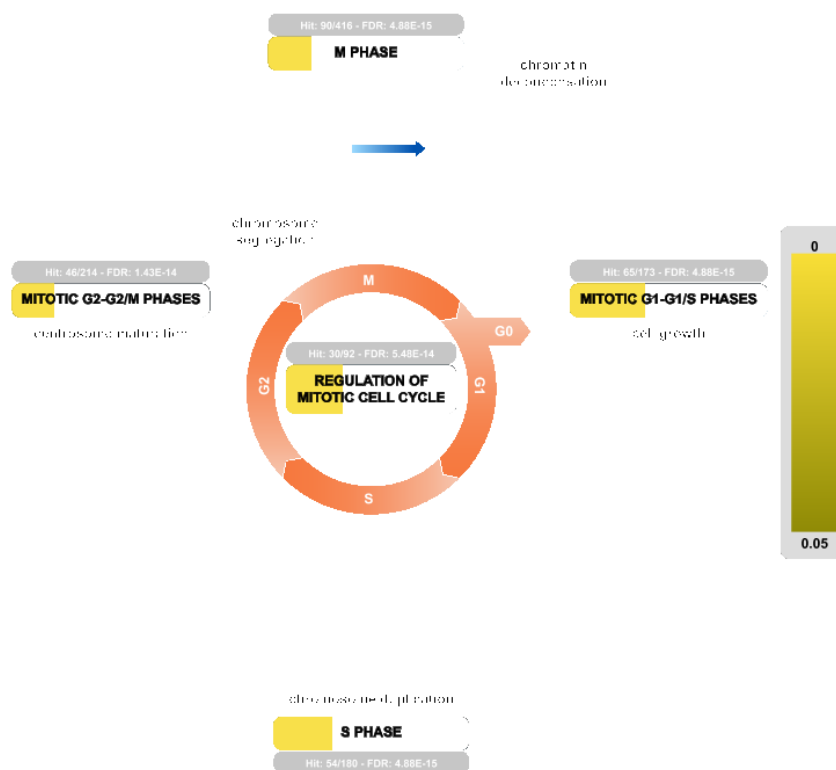

The events of replication of the genome and the subsequent segregation of chromosomes into daughter cells make up the cell cycle. DNA replication is carried out during a discrete temporal period known as the S (synthesis)-phase, and chromosome segregation occurs during a massive reorganization of cellular architecture at mitosis. Two gap-phases separate these cell cycle events: G1 between mitosis and S-phase, and G2 between S-phase and mitosis. Cells can exit the cell cycle for a period and enter a quiescent state known as G0, or terminally differentiate into cells that will not divide again, but undergo morphological development to carry out the wide variety of specialized functions of individual tissues.

A family of protein serine/threonine kinases known as the cyclin-dependent kinases (CDKs) controls progression through the cell cycle. As the name suggests, the kinase activity of the catalytic subunits is dependent on binding to cyclin partners, and control of cyclin abundance is one of several mechanisms by which CDK activity is regulated throughout the cell cycle.

A complex network of regulatory processes determines whether a quiescent cell (in G0 or early G1) will leave this state and initiate the processes to replicate its chromosomal DNA and divide. This regulation, during the **Mitotic G1-G1/S phases** of the cell cycle, centers on transcriptional regulation by the DREAM complex, with major roles for D and E type cyclin proteins.

Chromosomal DNA synthesis occurs in the **S phase**, or the synthesis phase, of the cell cycle. The cell duplicates its hereditary material, and two copies of each chromosome are formed. A key aspect of the **regulation of DNA replication** is the assembly and modification of a pre-replication complex assembled on ORC proteins.

**Mitotic G2-G2/M phases** encompass the interval between the completion of DNA synthesis and the beginning of mitosis. During G2, the cytoplasmic content of the cell increases. At G2/M transition, duplicated centrosomes mature and separate and CDK1:cyclin B complexes become active, setting the stage for spindle assembly and chromosome condensation at the start of mitotic **M phase**. Mitosis, or M phase, results in the generation of two daughter cells each with a complete diploid set of chromosomes. Events of the **M/G1 transition**, progression out of mitosis and division of the cell into two daughters (cytokinesis) are regulated by the Anaphase Promoting Complex.

The Anaphase Promoting Complex or Cyclosome (APC/C) plays additional roles in **regulation of the mitotic cell cycle**, insuring the appropriate length of the G1 phase. The APC/C itself is regulated by phosphorylation and interactions with checkpoint proteins.

## References

### Edit history

| Date       | Action   | Author                           |
|------------|----------|----------------------------------|
| 2005-01-01 | Authored | Walworth N, Bosco G, O'Donnell M |
| 2005-01-01 | Created  | Walworth N, Bosco G, O'Donnell M |
| 2010-01-19 | Revised  | Matthews L                       |
| 2011-06-15 | Reviewed | Grana X                          |
| 2011-08-25 | Reviewed | MacPherson D                     |
| 2011-08-27 | Revised  | Orlic-Milacic M                  |
| 2013-11-25 | Edited   | Matthews L, Gopinathrao G        |
| 2018-07-10 | Reviewed | Manfredi JJ                      |
| 2021-05-22 | Modified | Shorser S                        |

### Entities found in this pathway (137)

| Input  | UniProt Id     | Input   | UniProt Id     | Input   | UniProt Id     |
|--------|----------------|---------|----------------|---------|----------------|
| ACTR1A | P61163         | ANAPC11 | Q9NYG5         | ANAPC15 | P60006         |
| AURKA  | O14965, Q96GD4 | AURKB   | O14965, Q96GD4 | BANF1   | O75531         |
| BIRC5  | O15392         | BUB1    | O43683, O60566 | BUB1B   | O60566         |
| CCNA2  | P20248         | CCNB1   | P14635         | CCNB2   | O95067         |
| CCNE1  | P24864         | CCNE2   | O96020         | CDC20   | Q12834         |
| CDC25A | P30304         | CDC25C  | P30307         | CDC45   | O75419         |
| CDC6   | Q99741         | CDCA5   | Q96FF9         | CDCA8   | Q53HL2         |
| CDK1   | P06493, P24941 | CDK2    | P24941         | CDK4    | P11802         |
| CDKN2D | P55273         | CDT1    | Q9H211         | CENPA   | P49450         |
| CENPE  | Q02224         | CENPF   | P49454         | CENPH   | Q9H3R5         |
| CENPK  | Q9BS16         | CENPL   | Q8N0S6         | CENPM   | Q9NSP4         |
| CENPN  | Q96H22         | CENPO   | Q9BU64         | CENPU   | Q71F23         |
| CEP78  | Q5JTW2         | CKS1B   | P61024         | DBF4    | Q9UBU7         |
| DSN1   | Q9H410         | E2F1    | O00716, Q01094 | E2F2    | Q14209, Q16254 |
| ERCC6L | Q2NKX8         | ESCO2   | Q56N19         | ESPL1   | Q14674         |
| FBXO5  | Q9UKT4         | FEN1    | P39748         | FOXMI   | Q08050         |
| GINS1  | Q14691         | GINS2   | Q9Y248         | GINS3   | Q9BRX5         |

| Input    | UniProt Id     | Input     | UniProt Id     | Input     | UniProt Id     |
|----------|----------------|-----------|----------------|-----------|----------------|
| GINS4    | Q9BRT9         | GMNN      | O75496         | GOLGA2    | Q08379         |
| GTSE1    | Q9NYZ3         | H2AFX     | P16104         | H2AFZ     | P0C0S5         |
| HAUS8    | Q9BT25         | HIST1H2AJ | Q99878         | HIST1H2BH | P62807, Q93079 |
| HIST1H3F | P68431         | HIST2H2AC | Q16777         | HMMR      | O75330         |
| INCENP   | Q9NQS7         | KIF18A    | Q8NI77         | KIF20A    | O95235         |
| KIF23    | Q02241         | KIF2C     | Q99661         | LMNB1     | P20700         |
| MAD2L1   | Q13257         | MCM10     | Q7L590         | MCM2      | P33993, P49736 |
| MCM5     | P33992         | MCM6      | Q14566         | MCM7      | P33993         |
| MYBL2    | P10244         | MZT2B     | Q6NZ67         | NCAPD2    | Q15021         |
| NCAPG    | Q9BPX3         | NCAPH     | Q15003         | NDC80     | O14777         |
| NEK2     | P51955         | NUDC      | Q9Y266         | NUF2      | Q9BZD4         |
| NUP37    | Q8NFH4         | NUP85     | Q9BW27         | ORC1      | Q13415         |
| ORC6     | Q9Y5N6         | PKMYT1    | Q99640         | PLK1      | P53350         |
| PLK4     | O00444         | POLA2     | Q14181         | POLD1     | P28340         |
| POLD2    | P49005         | POLE2     | P56282         | PSMA2     | P25787         |
| PSMA4    | P25789         | PSMA6     | P60900         | PSMB3     | P49720         |
| PSMB4    | P28070         | PSMB7     | P40306, Q99436 | PSMC1     | P62191         |
| PSMC3    | P17980         | PSMC4     | P43686         | PSMC5     | P62195         |
| PSMD12   | O00232         | PSMD3     | O43242         | PTTG1     | O95997         |
| RAN      | P62826         | RANBP2    | P49792         | RBL2      | Q08999         |
| RCC1     | P18754         | RCC2      | Q9P258         | RFC2      | P35249, P35250 |
| RFC4     | P35249, P35250 | RFC5      | P40937, P40938 | RPA3      | P35244         |
| RRM2     | P31350         | SGO1      | Q5FBB7         | SGO2      | Q562F6         |
| SKA1     | Q96BD8         | SKA2      | Q8WVK7         | SPC24     | Q8NBT2         |
| SPC25    | Q9HBM1         | TFDP1     | Q14186         | TK1       | P04183         |
| TMPO     | P42167-1       | TOP2A     | P11388         | TPX2      | Q9ULW0         |
| TUBA1B   | P68363         | TUBA1C    | Q9BQE3         | TUBG1     | P23258, Q9NRH3 |
| TYMS     | P04818         | UBE2C     | O00762         | UBE2S     | Q16763         |
| VRK1     | Q99986         | ZWINT     | O95229         |           |                |

| Input | Ensembl Id      | Input  | Ensembl Id      | Input | Ensembl Id      |
|-------|-----------------|--------|-----------------|-------|-----------------|
| CCNA2 | ENSG00000145386 | CCNB1  | ENSG00000134057 | CCNB2 | ENSG00000157456 |
| CCNE1 | ENSG00000105173 | CDC25A | ENSG00000164045 | CDC45 | ENSG00000093009 |
| CDC6  | ENSG00000094804 | CDK1   | ENSG00000170312 | CDT1  | ENSG00000167513 |
| CENPF | ENSG00000117724 | E2F1   | ENSG00000101412 | FBXO5 | ENSG00000112029 |
| MYBL2 | ENSG00000101057 | ORC1   | ENSG00000085840 | PLK1  | ENSG00000166851 |
| RRM2  | ENSG00000171848 | TK1    | ENSG00000167900 | TOP2A | ENSG00000131747 |
| TYMS  | ENSG00000176890 |        |                 |       |                 |

## 15. DNA Replication Pre-Initiation (R-HSA-69002)

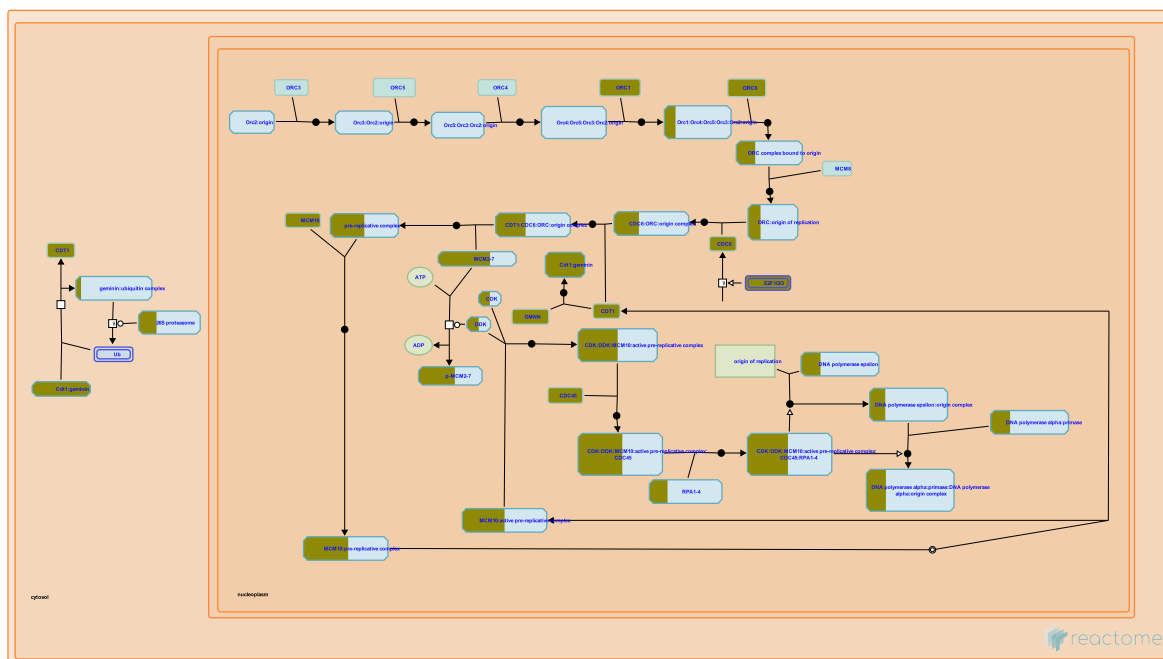

**Cellular compartments:** nucleoplasm, cytosol.

Although, DNA replication occurs in the S phase of the cell cycle, the formation of the DNA replication pre-initiation complex begins during G1 phase.

### References

### Edit history

| Date       | Action   | Author                        |
|------------|----------|-------------------------------|
| 2003-06-05 | Created  | Davey MJ, O'Donnell M         |
| 2006-03-17 | Authored | Davey MJ, Tye BK, O'Donnell M |
| 2021-05-18 | Edited   | Joshi-Tope G                  |
| 2021-05-22 | Modified | Shorser S                     |

### Entities found in this pathway (30)

| Input  | UniProt Id     | Input | UniProt Id     | Input | UniProt Id     |
|--------|----------------|-------|----------------|-------|----------------|
| CDC45  | O75419         | CDC6  | Q99741         | CDK2  | P24941         |
| CDT1   | Q9H211         | DBF4  | Q9UBU7         | E2F1  | O00716, Q01094 |
| E2F2   | Q14209         | GMNN  | O75496         | MCM10 | Q7L590         |
| MCM2   | P33993, P49736 | MCM5  | P33992         | MCM6  | Q14566         |
| MCM7   | P33993         | ORC1  | Q13415         | ORC6  | Q9Y5N6         |
| POLA2  | Q14181         | POLE2 | P56282         | PSMA2 | P25787         |
| PSMA4  | P25789         | PSMA6 | P60900         | PSMB3 | P49720         |
| PSMB4  | P28070         | PSMB7 | P40306, Q99436 | PSMC1 | P62191         |
| PSMC3  | P17980         | PSMC4 | P43686         | PSMC5 | P62195         |
| PSMD12 | O00232         | PSMD3 | O43242         | RPA3  | P35244         |

## 16. Mitotic Prometaphase (R-HSA-68877)

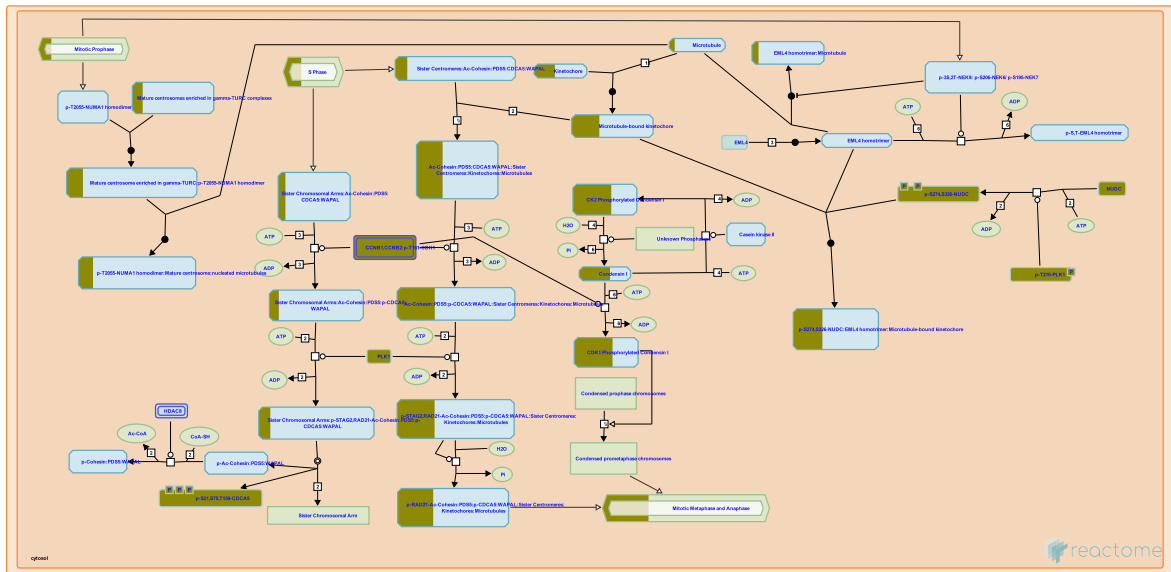

The dissolution of the nuclear membrane marks the beginning of the prometaphase. Kinetochores are created when proteins attach to the centromeres. Microtubules then attach at the kinetochores, and the chromosomes begin to move to the metaphase plate.

### References

### Edit history

| Date       | Action   | Author    |
|------------|----------|-----------|
| 2021-05-22 | Modified | Shorser S |

### Entities found in this pathway (54)

| Input  | UniProt Id | Input  | UniProt Id     | Input  | UniProt Id |
|--------|------------|--------|----------------|--------|------------|
| ACTR1A | P61163     | AURKA  | Q96GD4         | AURKB  | Q96GD4     |
| BIRC5  | O15392     | BUB1   | O43683, O60566 | BUB1B  | O60566     |
| CCNB1  | P14635     | CCNB2  | O95067         | CDC20  | Q12834     |
| CDCA5  | Q96FF9     | CDCA8  | Q53HL2         | CDK1   | P06493     |
| CENPA  | P49450     | CENPE  | Q02224         | CENPF  | P49454     |
| CENPH  | Q9H3R5     | CENPK  | Q9BS16         | CENPL  | Q8N0S6     |
| CENPM  | Q9NSP4     | CENPN  | Q96H22         | CENPO  | Q9BU64     |
| CENPU  | Q71F23     | CEP78  | Q5JTW2         | DSN1   | Q9H410     |
| ERCC6L | Q2NKX8     | HAUS8  | Q9BT25         | INCENP | Q9NQS7     |
| KIF18A | Q8NI77     | KIF2C  | Q99661         | MAD2L1 | Q13257     |
| MZT2B  | Q6NZ67     | NCAPD2 | Q15021         | NCAPG  | Q9BPX3     |
| NCAPH  | Q15003     | NDC80  | O14777         | NEK2   | P51955     |
| NUDC   | Q9Y266     | NUF2   | Q9BZD4         | NUP37  | Q8NFB4     |
| NUP85  | Q9BW27     | PLK1   | P53350         | PLK4   | O00444     |
| RANBP2 | P49792     | RCC2   | Q9P258         | SGO1   | Q5FBB7     |
| SGO2   | Q562F6     | SKA1   | Q96BD8         | SKA2   | Q8WVK7     |
| SPC24  | Q8NBT2     | SPC25  | Q9HBM1         | TUBA1B | P68363     |
| TUBA1C | Q9BQE3     | TUBG1  | P23258, Q9NRH3 | ZWINT  | O95229     |

## 17. Cell Cycle (R-HSA-1640170)

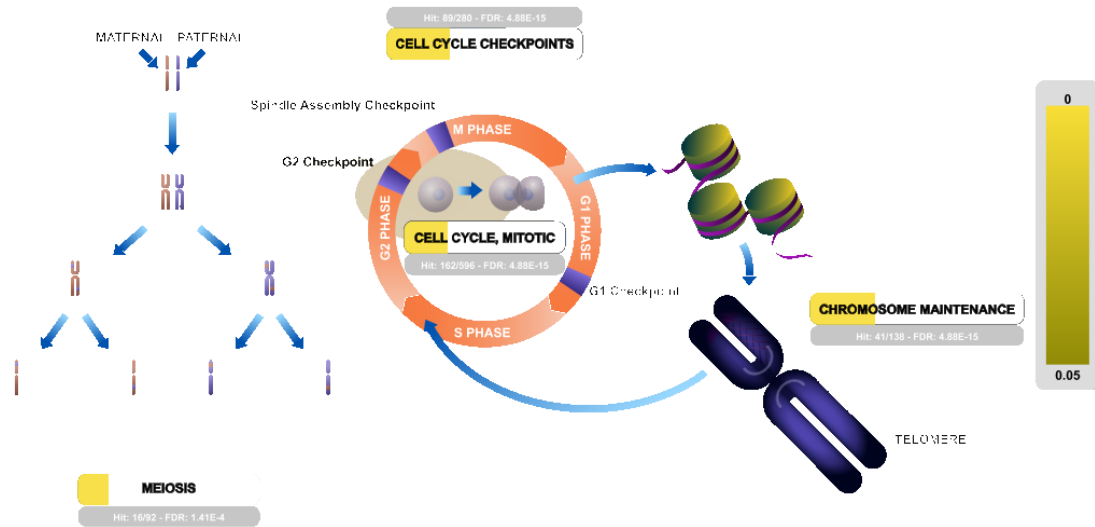

The replication of the genome and the subsequent segregation of chromosomes into daughter cells are controlled by a series of events collectively known as the **cell cycle**. DNA replication is carried out during a discrete temporal period known as the S (synthesis)-phase, and chromosome segregation occurs during a massive reorganization to cellular architecture at mitosis. Two gap-phases separate these major cell cycle events: G1 between mitosis and S-phase, and G2 between S-phase and mitosis. In the development of the human body, cells can exit the cell cycle for a period and enter a quiescent state known as G0, or terminally differentiate into cells that will not divide again, but undergo morphological development to carry out the wide variety of specialized functions of individual tissues.

A family of protein serine/threonine kinases known as the cyclin-dependent kinases (CDKs) controls progression through the cell cycle. As the name suggests, the activity of the catalytic subunit is dependent on binding to a cyclin partner. The human genome encodes several cyclins and several CDKs, with their names largely derived from the order in which they were identified. The oscillation of cyclin abundance is one important mechanism by which these enzymes phosphorylate key substrates to promote events at the relevant time and place. Additional post-translational modifications and interactions with regulatory proteins ensure that CDK activity is precisely regulated, frequently confined to a narrow window of activity.

In addition, genome integrity in the cell cycle is maintained by the action of a number of signal transduction pathways, known as **cell cycle checkpoints**, which monitor the accuracy and completeness of DNA replication during S phase and the orderly chromosomal condensation, pairing and partition into daughter cells during mitosis.

Replication of telomeric DNA at the ends of human chromosomes and packaging of their centromeres into chromatin are two aspects of **chromosome maintenance** that are integral parts of the cell cycle.

**Meiosis** is the specialized form of cell division that generates haploid gametes from diploid germ cells, associated with recombination (exchange of genetic material between chromosomal homologs).

## References

### Edit history

| Date       | Action   | Author     |
|------------|----------|------------|
| 2011-10-10 | Edited   | Matthews L |
| 2011-10-10 | Created  | Matthews L |
| 2021-05-22 | Modified | Shorser S  |

### Entities found in this pathway (162)

| Input     | UniProt Id     | Input     | UniProt Id     | Input    | UniProt Id     |
|-----------|----------------|-----------|----------------|----------|----------------|
| ACTR1A    | P61163         | ANAPC11   | Q9NYG5         | ANAPC15  | P60006         |
| AURKA     | O14965, Q96GD4 | AURKB     | O14965, Q96GD4 | BANF1    | O75531         |
| BIRC5     | O15392         | BLM       | P54132         | BRIP1    | Q9BX63         |
| BUB1      | O43683, O60566 | BUB1B     | O60566         | CCNA2    | P20248         |
| CCNB1     | P14635         | CCNB2     | O95067         | CCNE1    | P24864         |
| CCNE2     | O96020         | CDC20     | Q12834         | CDC25A   | P30304         |
| CDC25C    | P30307         | CDC45     | O75419         | CDC6     | Q99741         |
| CDCA5     | Q96FF9         | CDCA8     | Q53HL2         | CDK1     | P06493, P24941 |
| CDK2      | P24941         | CDK4      | P11802         | CDKN2D   | P55273         |
| CDT1      | Q9H211         | CENPA     | P49450         | CENPE    | Q02224         |
| CENPF     | P49454         | CENPH     | Q9H3R5         | CENPK    | Q9BS16         |
| CENPL     | Q8N0S6         | CENPM     | Q9NSP4         | CENPN    | Q96H22         |
| CENPO     | Q9BU64         | CENPU     | Q71F23         | CENPW    | Q5EE01         |
| CENPX     | A8MT69         | CEP78     | Q5JTW2         | CHEK1    | O14757         |
| CHEK2     | O96017         | CKS1B     | P61024         | DBF4     | Q9UBU7         |
| DSCC1     | Q9BVC3         | DSN1      | Q9H410         | E2F1     | O00716, Q01094 |
| E2F2      | Q14209, Q16254 | ERCC6L    | Q2NKX8         | ESCO2    | Q56N19         |
| ESPL1     | Q14674         | EXO1      | Q9UQ84         | FBX05    | Q9UKT4         |
| FEN1      | P39748         | FOXM1     | Q08050         | GINS1    | Q14691         |
| GINS2     | Q9Y248         | GINS3     | Q9BRX5         | GINS4    | Q9BRT9         |
| GMNN      | O75496         | GOLGA2    | Q08379         | GTSE1    | Q9NYZ3         |
| H2AFX     | P16104         | H2AFZ     | P0C0S5         | HAUS8    | Q9BT25         |
| HIST1H2AJ | Q99878         | HIST1H2BH | P62807, Q93079 | HIST1H3F | P68431         |
| HIST2H2AC | Q16777         | HJURP     | Q8NCD3         | HMMR     | O75330         |
| INCENP    | Q9NQS7         | KIF18A    | Q8NI77         | KIF20A   | O95235         |
| KIF23     | Q02241         | KIF2C     | Q99661         | LMNB1    | P20700         |
| MAD2L1    | Q13257         | MCM10     | Q7L590         | MCM2     | P33993, P49736 |
| MCM5      | P33992         | MCM6      | Q14566         | MCM7     | P33993         |
| MIS18A    | Q9NYP9         | MND1      | Q9BWT6         | MYBL2    | P10244         |
| MZT2B     | Q6NZ67         | NCAPD2    | Q15021         | NCAPG    | Q9BPX3         |
| NCAPH     | Q15003         | NDC80     | O14777         | NEK2     | P51955         |
| NHP2      | Q9NX24         | NUDC      | Q9Y266         | NUF2     | Q9BZD4         |
| NUP37     | Q8NFH4         | NUP85     | Q9BW27         | OIP5     | O43482         |
| ORC1      | Q13415         | ORC6      | Q9Y5N6         | PIF1     | Q9H611         |
| PKMYT1    | Q99640         | PLK1      | P53350         | PLK4     | O00444         |
| POLA2     | Q14181         | POLD1     | P28340         | POLD2    | P49005         |
| POLE2     | P56282         | POLR2B    | O15514         | POLR2F   | P61218         |
| POLR2I    | P36954         | POLR2J    | P52435         | PSMA2    | P25787         |

| Input  | UniProt Id     | Input   | UniProt Id     | Input  | UniProt Id     |
|--------|----------------|---------|----------------|--------|----------------|
| PSMA4  | P25789         | PSMA6   | P60900         | PSMB3  | P49720         |
| PSMB4  | P28070         | PSMB7   | P40306, Q99436 | PSMC1  | P62191         |
| PSMC3  | P17980         | PSMC3IP | Q9P2W1         | PSMC4  | P43686         |
| PSMC5  | P62195         | PSMD12  | O00232         | PSMD3  | O43242         |
| PTTG1  | O95997         | RAD51   | Q06609         | RAD54L | P46100         |
| RAN    | P62826         | RANBP2  | P49792         | RBL2   | Q08999         |
| RCC1   | P18754         | RCC2    | Q9P258         | RFC2   | P35249, P35250 |
| RFC4   | P35249, P35250 | RFC5    | P40937, P40938 | RMI2   | Q96E14         |
| RPA3   | P35244         | RRM2    | P31350         | RUVBL2 | Q9Y230         |
| SGO1   | Q5FBB7         | SGO2    | Q562F6         | SKA1   | Q96BD8         |
| SKA2   | Q8WVK7         | SPC24   | Q8NBT2         | SPC25  | Q9HBM1         |
| SYCE2  | Q6PIF2         | TFDP1   | Q14186         | TK1    | P04183         |
| TMPO   | P42167-1       | TOP2A   | P11388         | TPX2   | Q9ULW0         |
| TUBA1B | P68363         | TUBA1C  | Q9BQE3         | TUBG1  | P23258, Q9NRH3 |
| TYMS   | P04818         | UBE2C   | O00762         | UBE2S  | Q16763         |
| VRK1   | Q99986         | WRAP53  | Q9BUR4         | ZWINT  | O95229         |

  

| Input | Ensembl Id      | Input  | Ensembl Id      | Input | Ensembl Id      |
|-------|-----------------|--------|-----------------|-------|-----------------|
| CCNA2 | ENSG00000145386 | CCNB1  | ENSG00000134057 | CCNB2 | ENSG00000157456 |
| CCNE1 | ENSG00000105173 | CDC25A | ENSG00000164045 | CDC45 | ENSG00000093009 |
| CDC6  | ENSG00000094804 | CDK1   | ENSG00000170312 | CDT1  | ENSG00000167513 |
| CENPF | ENSG00000117724 | E2F1   | ENSG00000101412 | FBXO5 | ENSG00000112029 |
| MYBL2 | ENSG00000101057 | ORC1   | ENSG00000085840 | PLK1  | ENSG00000166851 |
| RRM2  | ENSG00000171848 | TK1    | ENSG00000167900 | TOP2A | ENSG00000131747 |
| TYMS  | ENSG00000176890 |        |                 |       |                 |

## 18. M Phase (R-HSA-68886)

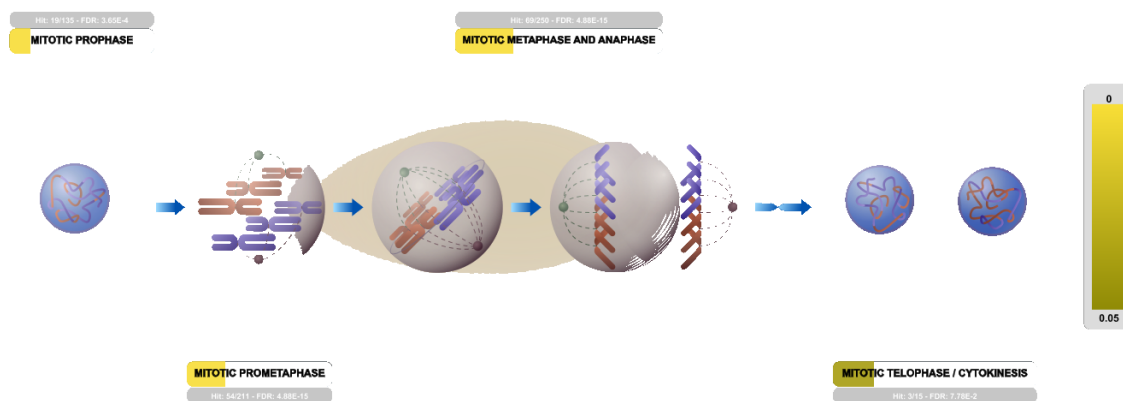

Mitosis, or the M phase, involves nuclear division and cytokinesis, where two identical daughter cells are produced. Mitosis involves prophase, prometaphase, metaphase, anaphase, and telophase. Finally, cytokinesis leads to cell division. The phase between two M phases is called the interphase; it encompasses the G1, S, and G2 phases of the cell cycle.

### References

#### Edit history

| Date       | Action   | Author      |
|------------|----------|-------------|
| 2018-07-10 | Reviewed | Manfredi JJ |
| 2021-05-22 | Modified | Shorser S   |

#### Entities found in this pathway (88)

| Input    | UniProt Id | Input     | UniProt Id     | Input     | UniProt Id     |
|----------|------------|-----------|----------------|-----------|----------------|
| ACTR1A   | P61163     | ANAPC11   | Q9NYG5         | ANAPC15   | P60006         |
| AURKA    | Q96GD4     | AURKB     | Q96GD4         | BANF1     | O75531         |
| BIRC5    | O15392     | BUB1      | O43683, O60566 | BUB1B     | O60566         |
| CCNB1    | P14635     | CCNB2     | O95067         | CDC20     | Q12834         |
| CDCA5    | Q96FF9     | CDCA8     | Q53HL2         | CDK1      | P06493         |
| CENPA    | P49450     | CENPE     | Q02224         | CENPF     | P49454         |
| CENPH    | Q9H3R5     | CENPK     | Q9BS16         | CENPL     | Q8N0S6         |
| CENPM    | Q9NSP4     | CENPN     | Q96H22         | CENPO     | Q9BU64         |
| CENPU    | Q71F23     | CEP78     | Q5JTW2         | DSN1      | Q9H410         |
| ERCC6L   | Q2NKX8     | ESPL1     | Q14674         | FBXO5     | Q9UKT4         |
| GOLGA2   | Q08379     | H2AFX     | P16104         | H2AFZ     | P0C0S5         |
| HAUS8    | Q9BT25     | HIST1H2AJ | Q99878         | HIST1H2BH | P62807, Q93079 |
| HIST1H3F | P68431     | HIST2H2AC | Q16777         | INCENP    | Q9NQS7         |
| KIF18A   | Q8NI77     | KIF20A    | O95235         | KIF23     | Q02241         |
| KIF2C    | Q99661     | LMNB1     | P20700         | MAD2L1    | Q13257         |
| MZT2B    | Q6NZ67     | NCAPD2    | Q15021         | NCAPG     | Q9BPX3         |
| NCAPH    | Q15003     | NDC80     | O14777         | NEK2      | P51955         |
| NUDC     | Q9Y266     | NUF2      | Q9BZD4         | NUP37     | Q8NFH4         |
| NUP85    | Q9BW27     | PLK1      | P53350         | PLK4      | O00444         |

| Input  | UniProt Id | Input  | UniProt Id | Input  | UniProt Id     |
|--------|------------|--------|------------|--------|----------------|
| PSMA2  | P25787     | PSMA4  | P25789     | PSMA6  | P60900         |
| PSMB3  | P49720     | PSMB4  | P28070     | PSMB7  | P40306, Q99436 |
| PSMC1  | P62191     | PSMC3  | P17980     | PSMC4  | P43686         |
| PSMC5  | P62195     | PSMD12 | O00232     | PSMD3  | O43242         |
| PTTG1  | O95997     | RAN    | P62826     | RANBP2 | P49792         |
| RCC1   | P18754     | RCC2   | Q9P258     | SGO1   | Q5FBB7         |
| SGO2   | Q562F6     | SKA1   | Q96BD8     | SKA2   | Q8WVK7         |
| SPC24  | Q8NBT2     | SPC25  | Q9HBM1     | TMPO   | P42167-1       |
| TUBA1B | P68363     | TUBA1C | Q9BQE3     | TUBG1  | P23258, Q9NRH3 |
| UBE2C  | O00762     | UBE2S  | Q16763     | VRK1   | Q99986         |
| ZWINT  | O95229     |        |            |        |                |

## 19. Cell Cycle Checkpoints (R-HSA-69620)

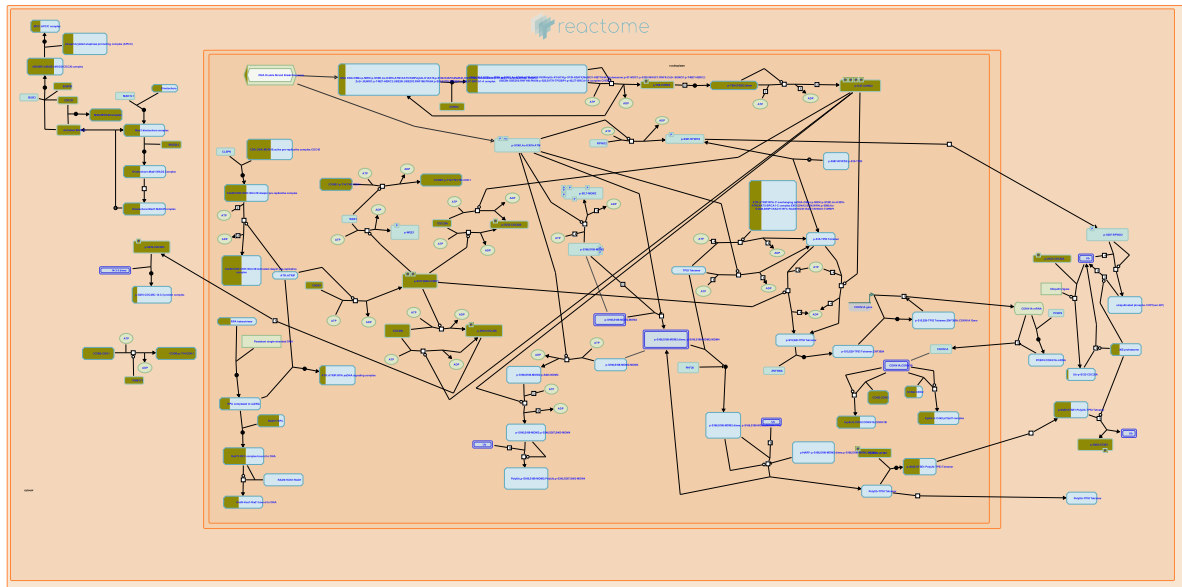

A hallmark of the human cell cycle in normal somatic cells is its precision. This remarkable fidelity is achieved by a number of signal transduction pathways, known as checkpoints, which monitor cell cycle progression ensuring an interdependency of S-phase and mitosis, the integrity of the genome and the fidelity of chromosome segregation.

Checkpoints are layers of control that act to delay CDK activation when defects in the division program occur. As the CDKs functioning at different points in the cell cycle are regulated by different means, the various checkpoints differ in the biochemical mechanisms by which they elicit their effect. However, all checkpoints share a common hierarchy of a sensor, signal transducers, and effectors that interact with the CDKs.

The stability of the genome in somatic cells contrasts to the almost universal genomic instability of tumor cells. There are a number of documented genetic lesions in checkpoint genes, or in cell cycle genes themselves, which result either directly in cancer or in a predisposition to certain cancer types. Indeed, restraint over cell cycle progression and failure to monitor genome integrity are likely prerequisites for the molecular evolution required for the development of a tumor. Perhaps most notable amongst these is the p53 tumor suppressor gene, which is mutated in >50% of human tumors. Thus, the importance of the checkpoint pathways to human biology is clear.

### References

#### Edit history

| Date       | Action   | Author                                                 |
|------------|----------|--------------------------------------------------------|
| 2005-01-01 | Authored | Walworth N, Hoffmann I, Yen TJ, O'Donnell M, Khanna KK |
| 2005-01-01 | Created  | Walworth N, Hoffmann I, Yen TJ, O'Donnell M, Khanna KK |
| 2013-11-25 | Edited   | Matthews L                                             |
| 2021-05-18 | Reviewed | Sanchez Y, Knudsen E, Hardwick KG                      |
| 2021-05-22 | Modified | Shorser S                                              |

#### Entities found in this pathway (87)

| Input   | UniProt Id     | Input     | UniProt Id     | Input  | UniProt Id     |
|---------|----------------|-----------|----------------|--------|----------------|
| ANAPC11 | Q9NYG5         | ANAPC15   | P60006         | AURKA  | Q96GD4         |
| AURKB   | Q96GD4         | BIRC5     | O15392         | BLM    | P54132         |
| BRIP1   | Q9BX63         | BUB1      | O43683, O60566 | BUB1B  | O60566         |
| CCNA2   | P20248         | CCNB1     | P14635         | CCNB2  | O95067         |
| CCNE1   | P24864         | CCNE2     | O96020         | CDC20  | Q12834         |
| CDC25A  | P30304         | CDC25C    | P30307         | CDC45  | O75419         |
| CDC6    | Q99741         | CDCA8     | Q53HL2         | CDK1   | P06493         |
| CDK2    | P24941         | CENPA     | P49450         | CENPE  | Q02224         |
| CENPF   | P49454         | CENPH     | Q9H3R5         | CENPK  | Q9BS16         |
| CENPL   | Q8N0S6         | CENPM     | Q9NSP4         | CENPN  | Q96H22         |
| CENPO   | Q9BU64         | CENPU     | Q71F23         | CHEK1  | O14757         |
| CHEK2   | O96017         | DBF4      | Q9UBU7         | DSN1   | Q9H410         |
| ERCC6L  | Q2NKX8         | EXO1      | Q9UQ84         | GTSE1  | Q9NYZ3         |
| H2AFX   | P16104         | HIST1H2BH | P62807, Q93079 | INCENP | Q9NQS7         |
| KIF18A  | Q8NI77         | KIF2C     | Q99661         | MAD2L1 | Q13257         |
| MCM10   | Q7L590         | MCM2      | P33993, P49736 | MCM5   | P33992         |
| MCM6    | Q14566         | MCM7      | P33993         | NDC80  | O14777         |
| NUDC    | Q9Y266         | NUF2      | Q9BZD4         | NUP37  | Q8NFB4         |
| NUP85   | Q9BW27         | ORC1      | Q13415         | ORC6   | Q9Y5N6         |
| PKMYT1  | Q99640         | PLK1      | P53350         | PSMA2  | P25787         |
| PSMA4   | P25789         | PSMA6     | P60900         | PSMB3  | P49720         |
| PSMB4   | P28070         | PSMB7     | P40306, Q99436 | PSMC1  | P62191         |
| PSMC3   | P17980         | PSMC4     | P43686         | PSMC5  | P62195         |
| PSMD12  | O00232         | PSMD3     | O43242         | RANBP2 | P49792         |
| RCC2    | Q9P258         | RFC2      | P35249, P35250 | RFC4   | P35249, P35250 |
| RFC5    | P40937, P40938 | RMI2      | Q96E14         | RPA3   | P35244         |
| SGO1    | Q5FBB7         | SGO2      | Q562F6         | SKA1   | Q96BD8         |
| SKA2    | Q8WVK7         | SPC24     | Q8NBT2         | SPC25  | Q9HBM1         |
| UBE2C   | O00762         | UBE2S     | Q16763         | ZWINT  | O95229         |

## 20. Mitotic Metaphase and Anaphase (R-HSA-2555396)

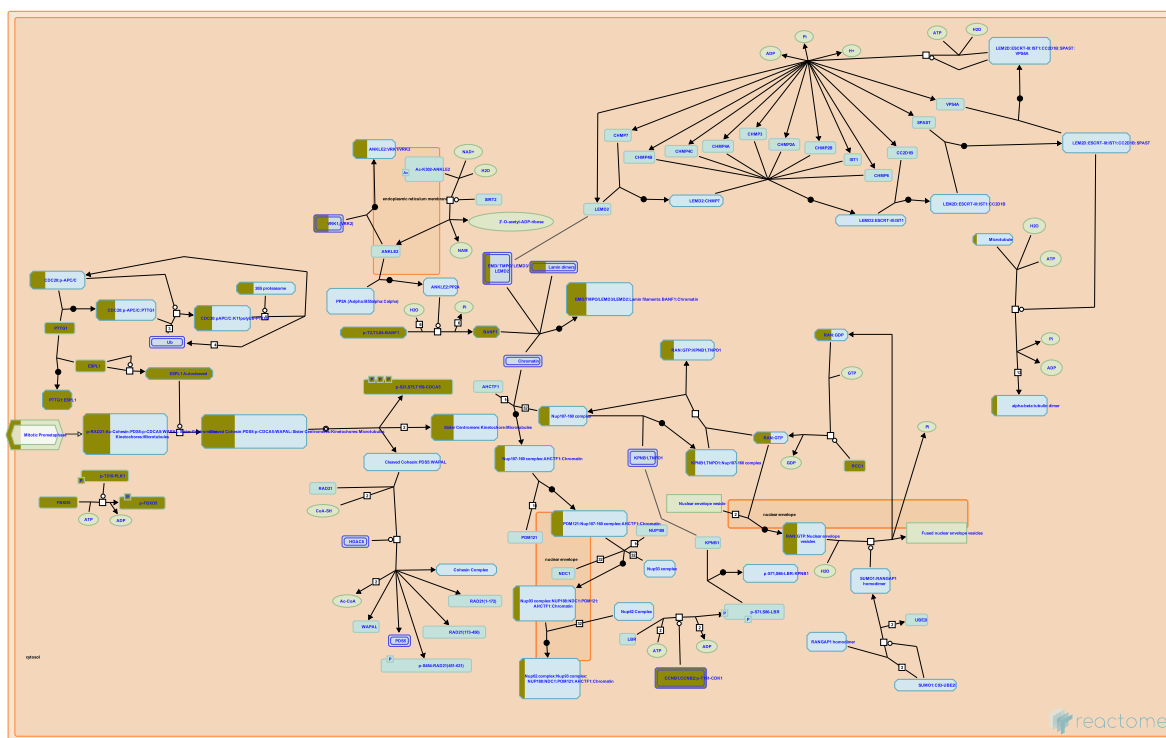

**Cellular compartments:** cytosol.

Metaphase is marked by the formation of the metaphase plate. The metaphase plate is formed when the spindle fibers align the chromosomes along the middle of the cell. Such an organization helps to ensure that later, when the chromosomes are separated, each new nucleus that is formed receives one copy of each chromosome. This pathway has not yet been annotated in Reactome.

The metaphase to anaphase transition during mitosis is triggered by the destruction of mitotic cyclins.

In anaphase, the paired chromosomes separate at the centromeres, and move to the opposite sides of the cell. The movement of the chromosomes is facilitated by a combination of kinetochore movement along the spindle microtubules and through the physical interaction of polar microtubules.

### References

### Edit history

| Date       | Action   | Author          |
|------------|----------|-----------------|
| 2012-11-02 | Created  | Orlic-Milacic M |
| 2021-05-22 | Modified | Shorser S       |

### Entities found in this pathway (69)

| Input   | UniProt Id     | Input   | UniProt Id | Input | UniProt Id |
|---------|----------------|---------|------------|-------|------------|
| ANAPC11 | Q9NYG5         | ANAPC15 | P60006     | AURKA | Q96GD4     |
| AURKB   | Q96GD4         | BANF1   | O75531     | BIRC5 | O15392     |
| BUB1    | O43683, O60566 | BUB1B   | O60566     | CCNB1 | P14635     |

| Input  | UniProt Id | Input  | UniProt Id | Input  | UniProt Id     |
|--------|------------|--------|------------|--------|----------------|
| CCNB2  | O95067     | CDC20  | Q12834     | CDCA5  | Q96FF9         |
| CDCA8  | Q53HL2     | CDK1   | P06493     | CENPA  | P49450         |
| CENPE  | Q02224     | CENPF  | P49454     | CENPH  | Q9H3R5         |
| CENPK  | Q9BS16     | CENPL  | Q8N0S6     | CENPM  | Q9NSP4         |
| CENPN  | Q96H22     | CENPO  | Q9BU64     | CENPU  | Q71F23         |
| DSN1   | Q9H410     | ERCC6L | Q2NKX8     | ESPL1  | Q14674         |
| FBXO5  | Q9UKT4     | INCENP | Q9NQS7     | KIF18A | Q8NI77         |
| KIF2C  | Q99661     | LMNB1  | P20700     | MAD2L1 | Q13257         |
| NDC80  | O14777     | NUDC   | Q9Y266     | NUF2   | Q9BZD4         |
| NUP37  | Q8NFB4     | NUP85  | Q9BW27     | PLK1   | P53350         |
| PSMA2  | P25787     | PSMA4  | P25789     | PSMA6  | P60900         |
| PSMB3  | P49720     | PSMB4  | P28070     | PSMB7  | P40306, Q99436 |
| PSMC1  | P62191     | PSMC3  | P17980     | PSMC4  | P43686         |
| PSMC5  | P62195     | PSMD12 | O00232     | PSMD3  | O43242         |
| PTTG1  | O95997     | RAN    | P62826     | RANBP2 | P49792         |
| RCC1   | P18754     | RCC2   | Q9P258     | SGO1   | Q5FBB7         |
| SGO2   | Q562F6     | SKA1   | Q96BD8     | SKA2   | Q8WVK7         |
| SPC24  | Q8NBT2     | SPC25  | Q9HBM1     | TMPO   | P42167-1       |
| TUBA1B | P68363     | TUBA1C | Q9BQE3     | UBE2C  | O00762         |
| UBE2S  | Q16763     | VRK1   | Q99986     | ZWINT  | O95229         |

## 21. Mitotic Anaphase (R-HSA-68882)

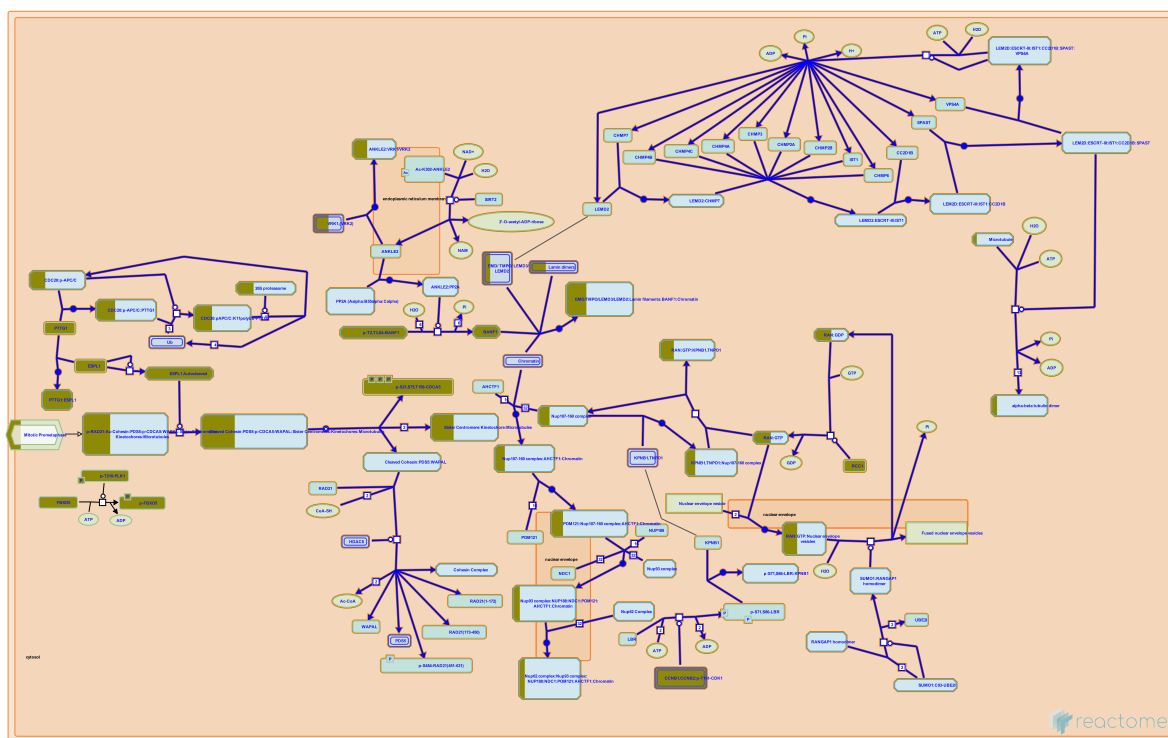

In anaphase, the paired chromosomes separate at the centromeres, and move to the opposite sides of the cell. The movement of the chromosomes is facilitated by a combination of kinetochore movement along the spindle microtubules and through the physical interaction of polar microtubules.

### References

### Edit history

| Date       | Action   | Author    |
|------------|----------|-----------|
| 2021-05-22 | Modified | Shorser S |

### Entities found in this pathway (68)

| Input   | UniProt Id     | Input   | UniProt Id | Input | UniProt Id |
|---------|----------------|---------|------------|-------|------------|
| ANAPC11 | Q9NYG5         | ANAPC15 | P60006     | AURKA | Q96GD4     |
| AURKB   | Q96GD4         | BANF1   | O75531     | BIRC5 | O15392     |
| BUB1    | O43683, O60566 | BUB1B   | O60566     | CCNB1 | P14635     |
| CCNB2   | O95067         | CDC20   | Q12834     | CDCA5 | Q96FF9     |
| CDCA8   | Q53HL2         | CDK1    | P06493     | CENPA | P49450     |
| CENPE   | Q02224         | CENPF   | P49454     | CENPH | Q9H3R5     |
| CENPK   | Q9BS16         | CENPL   | Q8N0S6     | CENPM | Q9NSP4     |
| CENPN   | Q96H22         | CENPO   | Q9BU64     | CENPU | Q71F23     |
| DSN1    | Q9H410         | ERCC6L  | Q2NKX8     | ESPL1 | Q14674     |
| INCENP  | Q9NQS7         | KIF18A  | Q8NI77     | KIF2C | Q99661     |
| LMNB1   | P20700         | MAD2L1  | Q13257     | NDC80 | O14777     |
| NUDC    | Q9Y266         | NUF2    | Q9BZD4     | NUP37 | Q8NFH4     |
| NUP85   | Q9BW27         | PLK1    | P53350     | PSMA2 | P25787     |
| PSMA4   | P25789         | PSMA6   | P60900     | PSMB3 | P49720     |

| Input  | UniProt Id | Input  | UniProt Id     | Input  | UniProt Id |
|--------|------------|--------|----------------|--------|------------|
| PSMB4  | P28070     | PSMB7  | P40306, Q99436 | PSMC1  | P62191     |
| PSMC3  | P17980     | PSMC4  | P43686         | PSMC5  | P62195     |
| PSMD12 | O00232     | PSMD3  | O43242         | PTTG1  | O95997     |
| RAN    | P62826     | RANBP2 | P49792         | RCC1   | P18754     |
| RCC2   | Q9P258     | SGO1   | Q5FBB7         | SGO2   | Q562F6     |
| SKA1   | Q96BD8     | SKA2   | Q8WVK7         | SPC24  | Q8NBT2     |
| SPC25  | Q9HBM1     | TMPO   | P42167-1       | TUBA1B | P68363     |
| TUBA1C | Q9BQE3     | UBE2C  | O00762         | UBE2S  | Q16763     |
| VRK1   | Q99986     | ZWINT  | O95229         |        |            |

## 22. EML4 and NUDC in mitotic spindle formation (R-HSA-9648025)

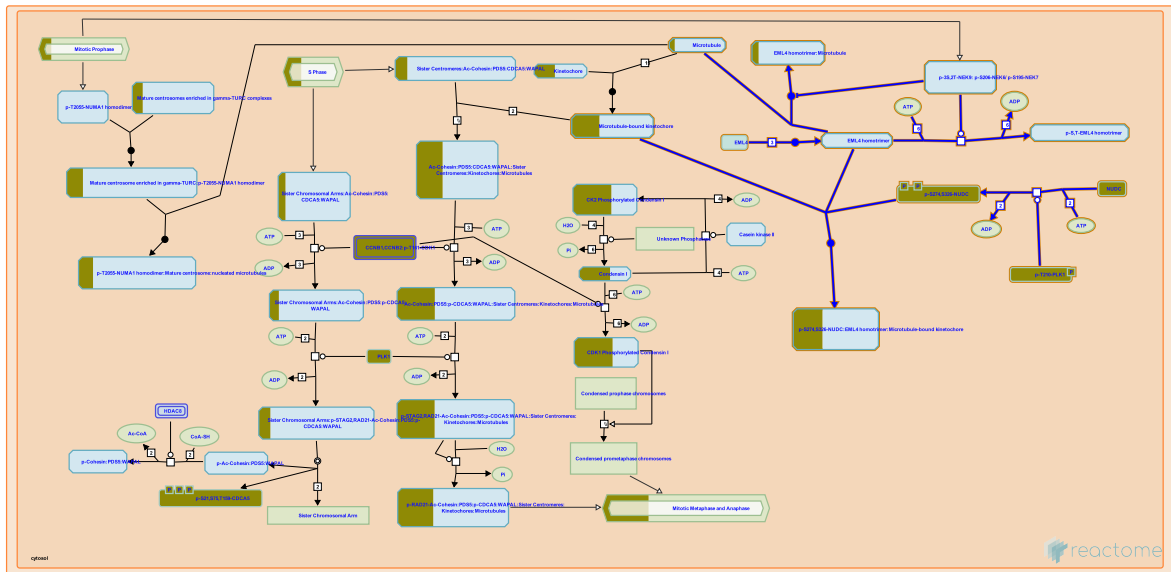

EML4 and NUDC proteins are required for mitotic spindle formation, attachment of spindle microtubule ends to kinetochores, and alignment of mitotic chromosome at the metaphase plate. EML4 is a WD40 family protein that binds to interphase microtubules and stabilizes them (Houtman et al. 2007, Adib et al. 2019). At mitotic entry, EML4 undergoes phosphorylation (Pollmann et al. 2006, Adib et al. 2019) by serine/threonine kinases NEK6 and NEK7, leading to its dissociation from microtubules, which is necessary for the assembly of a dynamic mitotic spindle (Adib et al. 2019). EML4, through its WD40 repeats, interacts with NUDC and recruits it to the kinetochores of the mitotic spindle (Chen et al. 2015). It is possible that other mitotic kinases, besides NEK6 and NEK7, also phosphorylate EML4. Phosphorylation of different residues of EML4 could reduce or increase affinity of EML4 for specific subpopulations of microtubules in mitosis.

A recurrent genomic rearrangement, reported in about 5% cases of non-small cell lung cancer (NSCLC) fuses the N-terminal portion of EML4 with the C-terminal portion of ALK (anaplastic lymphoma kinase), resulting in a constitutively active ALK (Soda et al. 2007, Richards et al. 2015).

### References

- Chen D, Ito S, Yuan H, Hyodo T, Kadomatsu K, Hamaguchi M & Senga T (2015). EML4 promotes the loading of NUDC to the spindle for mitotic progression. *Cell Cycle*, 14, 1529-39. [↗](#)
- Pollmann M, Parwaresch R, Adam-Klages S, Kruse ML, Buck F & Heidebrecht HJ (2006). Human EML4, a novel member of the EMAP family, is essential for microtubule formation. *Exp. Cell Res.*, 312, 3241-51. [↗](#)
- Richards MW, O'Regan L, Roth D, Montgomery JM, Straube A, Fry AM & Bayliss R (2015). Microtubule association of EML proteins and the EML4-ALK variant 3 oncoprotein require an N-terminal trimerization domain. *Biochem. J.*, 467, 529-36. [↗](#)
- Soda M, Choi YL, Enomoto M, Takada S, Yamashita Y, Ishikawa S, ... Mano H (2007). Identification of the transforming EML4-ALK fusion gene in non-small-cell lung cancer. *Nature*, 448, 561-6. [↗](#)
- Adib R, Montgomery JM, Atherton J, O'Regan L, Richards MW, Straatman KR, ... Fry AM (2019). Mitotic phosphorylation by NEK6 and NEK7 reduces the microtubule affinity of EML4 to promote chromosome congression. *Sci Signal*, 12. [↗](#)

## Edit history

| Date       | Action   | Author                       |
|------------|----------|------------------------------|
| 2019-06-04 | Created  | Orlic-Milacic M              |
| 2019-06-25 | Authored | Orlic-Milacic M              |
| 2019-09-30 | Reviewed | O'Regan L, Fry AM, Lucken KJ |
| 2019-10-03 | Reviewed | Bechstedt S                  |
| 2019-10-07 | Edited   | Orlic-Milacic M              |
| 2021-05-22 | Modified | Shorser S                    |

## Entities found in this pathway (40)

| Input  | UniProt Id     | Input  | UniProt Id | Input  | UniProt Id |
|--------|----------------|--------|------------|--------|------------|
| AURKA  | Q96GD4         | AURKB  | Q96GD4     | BIRC5  | O15392     |
| BUB1   | O43683, O60566 | BUB1B  | O60566     | CDC20  | Q12834     |
| CDCA8  | Q53HL2         | CENPA  | P49450     | CENPE  | Q02224     |
| CENPF  | P49454         | CENPH  | Q9H3R5     | CENPK  | Q9BS16     |
| CENPL  | Q8N0S6         | CENPM  | Q9NSP4     | CENPN  | Q96H22     |
| CENPO  | Q9BU64         | CENPU  | Q71F23     | DSN1   | Q9H410     |
| ERCC6L | Q2NKX8         | INCENP | Q9NQS7     | KIF18A | Q8NI77     |
| KIF2C  | Q99661         | MAD2L1 | Q13257     | NDC80  | O14777     |
| NUDC   | Q9Y266         | NUF2   | Q9BZD4     | NUP37  | Q8NFB4     |
| NUP85  | Q9BW27         | PLK1   | P53350     | RANBP2 | P49792     |
| RCC2   | Q9P258         | SGO1   | Q5FBB7     | SGO2   | Q562F6     |
| SKA1   | Q96BD8         | SKA2   | Q8WVK7     | SPC24  | Q8NBT2     |
| SPC25  | Q9HBM1         | TUBA1B | P68363     | TUBA1C | Q9BQE3     |
| ZWINT  | O95229         |        |            |        |            |



Different formins are activated by different RHO GTPases in different cell contexts. FMNL1 (formin-like protein 1) is activated by binding to the RAC1:GTP and is involved in the formation of lamellipodia in macrophages (Yayoshi-Yamamoto et al. 2000) and is involved in the regulation of the Golgi complex structure (Colon-Franco et al. 2011). Activation of FMNL1 by CDC42:GTP contributes to the formation of the phagocytic cup (Seth et al. 2006). Activation of FMNL2 (formin-like protein 2) and FMNL3 (formin-like protein 3) by RHOC:GTP is involved in cancer cell motility and invasiveness (Kitzing et al. 2010, Vega et al. 2011). DIAPH1, activated by RHOA:GTP, promotes elongation of actin filaments and activation of SRF-mediated transcription which is inhibited by unpolymerized actin (Miralles et al. 2003). RHOF-mediated activation of DIAPH1 is implicated in formation of stress fibers (Fan et al. 2010). Activation of DIAPH1 and DIAPH3 by RHOB:GTP leads to actin coat formation around endosomes and regulates endosome motility and trafficking (Fernandez-Borja et al. 2005, Wallar et al. 2007). Endosome trafficking is also regulated by DIAPH2 transcription isoform 3 (DIAPH2-3) which, upon activation by RHOD:GTP, recruits SRC kinase to endosomes (Tomimaga et al. 2000, Gasman et al. 2003). DIAPH2 transcription isoform 2 (DIAPH2-2) is involved in mitosis where, upon being activated by CDC42:GTP, it facilitates the capture of astral microtubules by kinetochores (Yasuda et al. 2004, Cheng et al. 2011). DIAPH2 is implicated in ovarian maintenance and premature ovarian failure (Bione et al. 1998). DAAM1, activated by RHOA:GTP, is involved in linking WNT signaling to cytoskeleton reorganization (Habas et al. 2001).

## References

- Kühn S & Geyer M (2014). Formins as effector proteins of Rho GTPases. *Small GTPases*, 5, e29513. [↗](#)
- Li F & Higgs HN (2003). The mouse Formin mDia1 is a potent actin nucleation factor regulated by autoinhibition. *Curr. Biol.*, 13, 1335-40. [↗](#)
- Lammers M, Rose R, Scrima A & Wittinghofer A (2005). The regulation of mDia1 by autoinhibition and its release by Rho\*GTP. *EMBO J.*, 24, 4176-87. [↗](#)
- Nezami AG, Poy F & Eck MJ (2006). Structure of the autoinhibitory switch in formin mDia1. *Structure*, 14, 257-63. [↗](#)
- Xu Y, Moseley JB, Sagot I, Poy F, Pellman D, Goode BL & Eck MJ (2004). Crystal structures of a Formin Homology-2 domain reveal a tethered dimer architecture. *Cell*, 116, 711-23. [↗](#)

## Edit history

| Date       | Action   | Author          |
|------------|----------|-----------------|
| 2014-10-24 | Authored | Orlic-Milacic M |
| 2014-12-26 | Authored | Rivero Crespo F |
| 2015-01-17 | Created  | Orlic-Milacic M |
| 2015-02-02 | Edited   | Orlic-Milacic M |
| 2021-05-22 | Modified | Shorser S       |

## Entities found in this pathway (41)

| Input | UniProt Id     | Input | UniProt Id | Input | UniProt Id |
|-------|----------------|-------|------------|-------|------------|
| AURKA | Q96GD4         | AURKB | Q96GD4     | BIRC5 | O15392     |
| BUB1  | O43683, O60566 | BUB1B | O60566     | CDC20 | Q12834     |

| Input  | UniProt Id | Input  | UniProt Id | Input  | UniProt Id |
|--------|------------|--------|------------|--------|------------|
| CDCA8  | Q53HL2     | CENPA  | P49450     | CENPE  | Q02224     |
| CENPF  | P49454     | CENPH  | Q9H3R5     | CENPK  | Q9BS16     |
| CENPL  | Q8N0S6     | CENPM  | Q9NSP4     | CENPN  | Q96H22     |
| CENPO  | Q9BU64     | CENPU  | Q71F23     | DIAPH3 | Q9NSV4     |
| DSN1   | Q9H410     | ERCC6L | Q2NKX8     | INCENP | Q9NQS7     |
| KIF18A | Q8NI77     | KIF2C  | Q99661     | MAD2L1 | Q13257     |
| NDC80  | O14777     | NUDC   | Q9Y266     | NUF2   | Q9BZD4     |
| NUP37  | Q8NFH4     | NUP85  | Q9BW27     | PLK1   | P53350     |
| RANBP2 | P49792     | RCC2   | Q9P258     | SGO1   | Q5FBB7     |
| SGO2   | Q562F6     | SKA1   | Q96BD8     | SKA2   | Q8WVK7     |
| SPC24  | Q8NBT2     | SPC25  | Q9HBM1     | TUBA1B | P68363     |
| TUBA1C | Q9BQE3     | ZWINT  | O95229     |        |            |

## 24. Mitotic G2-G2/M phases (R-HSA-453274)

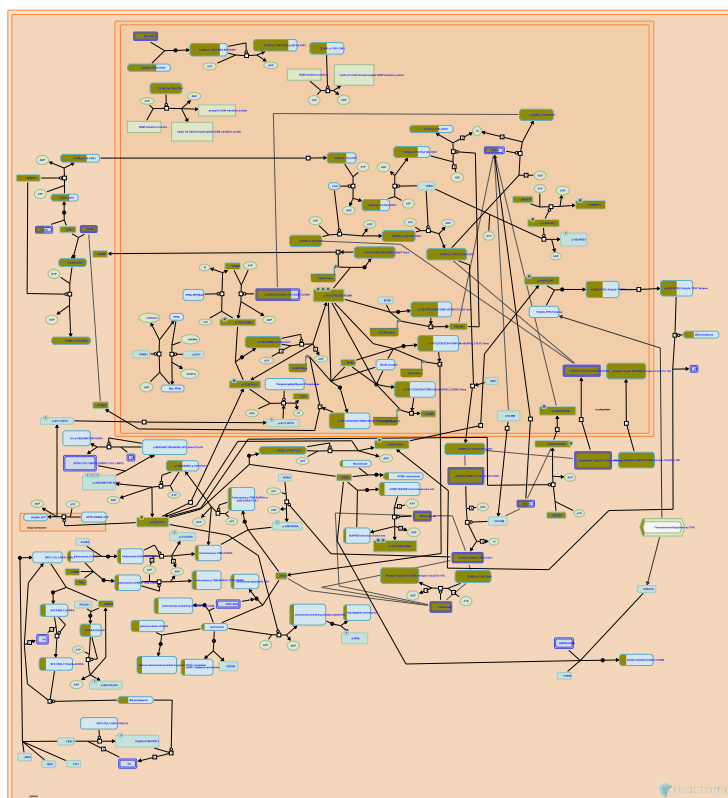

Mitotic G2 (gap 2) phase is the second growth phase during eukaryotic mitotic cell cycle. G2 encompasses the interval between the completion of DNA synthesis and the beginning of mitosis. During G2, the cytoplasmic content of the cell increases. At G2/M transition, duplicated centrosomes mature and separate and CDK1:cyclin B complexes become active, setting the stage for spindle assembly and chromosome condensation that occur in the prophase of mitosis (O'Farrell 2001, Bruinsma et al. 2012, Jiang et al. 2014).

### References

- Wang G, Jiang Q & Zhang C (2014). The role of mitotic kinases in coupling the centrosome cycle with the assembly of the mitotic spindle. *J. Cell. Sci.*, 127, 4111-22. [↗](#)
- O'Farrell PH (2001). Triggering the all-or-nothing switch into mitosis. *Trends Cell Biol.*, 11, 512-9. [↗](#)
- Bruinsma W, Raaijmakers JA & Medema RH (2012). Switching Polo-like kinase-1 on and off in time and space. *Trends Biochem. Sci.*, 37, 534-42. [↗](#)

### Edit history

| Date       | Action   | Author          |
|------------|----------|-----------------|
| 2010-01-20 | Created  | Matthews L      |
| 2017-03-24 | Edited   | Orlic-Milacic M |
| 2018-07-10 | Reviewed | Manfredi JJ     |
| 2021-05-22 | Modified | Shorser S       |

### Entities found in this pathway (39)

| Input  | UniProt Id     | Input  | UniProt Id     | Input  | UniProt Id     |
|--------|----------------|--------|----------------|--------|----------------|
| ACTR1A | P61163         | AURKA  | O14965         | AURKB  | O14965         |
| CCNA2  | P20248         | CCNB1  | P14635         | CCNB2  | O95067         |
| CDC25A | P30304         | CDC25C | P30307         | CDK1   | P06493, P24941 |
| CDK2   | P24941         | CENPF  | P49454         | CEP78  | Q5JTW2         |
| E2F1   | O00716, Q01094 | FOXM1  | Q08050         | GTSE1  | Q9NYZ3         |
| HAUS8  | Q9BT25         | HMMR   | O75330         | MYBL2  | P10244         |
| MZT2B  | Q6NZ67         | NEK2   | P51955         | PKMYT1 | Q99640         |
| PLK1   | P53350         | PLK4   | O00444         | PSMA2  | P25787         |
| PSMA4  | P25789         | PSMA6  | P60900         | PSMB3  | P49720         |
| PSMB4  | P28070         | PSMB7  | P40306, Q99436 | PSMC1  | P62191         |
| PSMC3  | P17980         | PSMC4  | P43686         | PSMC5  | P62195         |
| PSMD12 | O00232         | PSMD3  | O43242         | TPX2   | Q9ULW0         |
| TUBA1B | P68363         | TUBA1C | Q9BQE3         | TUBG1  | P23258, Q9NRH3 |

  

| Input | Ensembl Id      | Input | Ensembl Id      | Input  | Ensembl Id      |
|-------|-----------------|-------|-----------------|--------|-----------------|
| CCNB1 | ENSG00000134057 | CCNB2 | ENSG00000157456 | CDC25A | ENSG00000164045 |
| CENPF | ENSG00000117724 | PLK1  | ENSG00000166851 |        |                 |

## 25. RHO GTPase Effectors (R-HSA-195258)

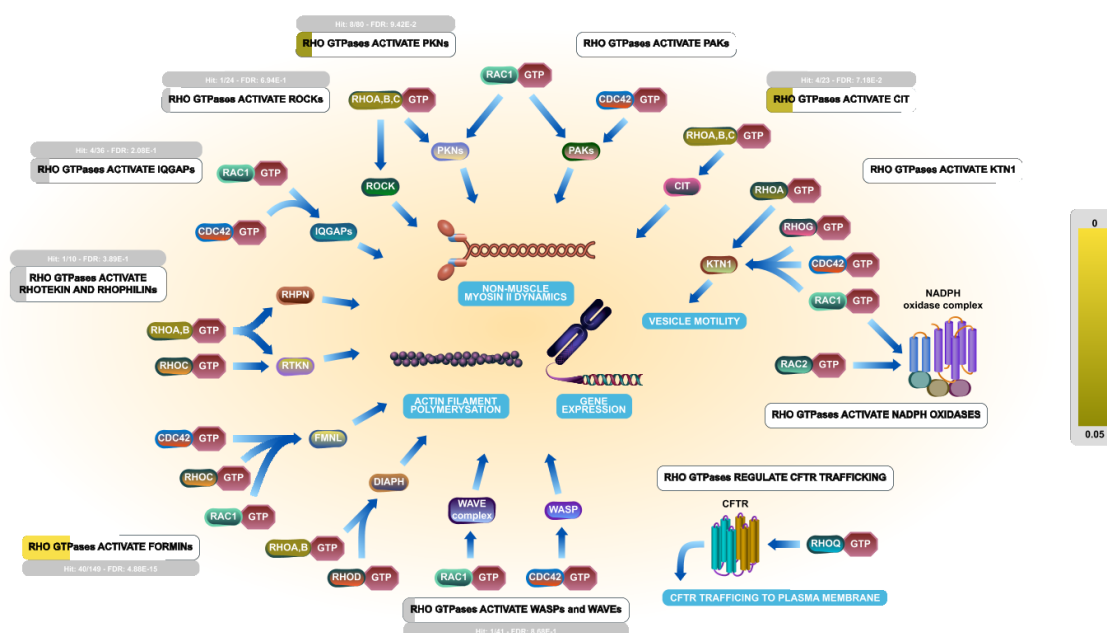

RHO GTPases regulate cell behaviour by activating a number of downstream effectors that regulate cytoskeletal organization, intracellular trafficking and transcription (reviewed by Sahai and Marshall 2002).

One of the best studied RHO GTPase effectors are protein kinases ROCK1 and ROCK2, which are activated by binding RHOA, RHOB or RHOC. ROCK1 and ROCK2 phosphorylate many proteins involved in the stabilization of actin filaments and generation of actin-myosin contractile force, such as LIM kinases and myosin regulatory light chains (MRLC) (Amano et al. 1996, Ishizaki et al. 1996, Leung et al. 1996, Ohashi et al. 2000, Sumi et al. 2001, Riento and Ridley 2003, Watanabe et al. 2007).

PAK1, PAK2 and PAK3, members of the p21-activated kinase family, are activated by binding to RHO GTPases RAC1 and CDC42 and subsequent autophosphorylation and are involved in cytoskeleton regulation (Manser et al. 1994, Manser et al. 1995, Zhang et al. 1998, Edwards et al. 1999, Lei et al. 2000, Parrini et al. 2002; reviewed by Daniels and Bokoch 1999, Szczepanowska 2009).

RHOA, RHOB, RHOC and RAC1 activate protein kinase C related kinases (PKNs) PKN1, PKN2 and PKN3 (Maesaki et al. 1999, Zong et al. 1999, Owen et al. 2003, Modha et al. 2008, Hutchinson et al. 2011, Hutchinson et al. 2013), bringing them in proximity to the PIP3-activated PDK1 (PDK1) and thus enabling PDK1-mediated phosphorylation of PKN1, PKN2 and PKN3 (Flynn et al. 2000, Torbett et al. 2003). PKNs play important roles in cytoskeleton organization (Hamaguchi et al. 2000), regulation of cell cycle (Misaki et al. 2001), receptor trafficking (Metzger et al. 2003) and apoptosis (Takahashi et al. 1998). PKN1 is also involved in the ligand-dependent transcriptional activation by the androgen receptor (Metzger et al. 2003, Metzger et al. 2005, Metzger et al. 2008).

Citron kinase (CIT) binds RHO GTPases RHOA, RHOB, RHOC and RAC1 (Madaule et al. 1995), but the mechanism of CIT activation by GTP-bound RHO GTPases has not been elucidated. CIT and RHOA are implicated to act together in Golgi apparatus organization through regulation of the actin cytoskeleton (Camera et al. 2003). CIT is also involved in the regulation of cytokinesis through its interaction with KIF14 (Gruneberg et al. 2006, Bassi et al. 2013, Watanabe et al. 2013).

RHOA, RHOG, RAC1 and CDC42 bind kinectin (KTN1), a kinesin anchor protein involved in kinesin-mediated vesicle motility (Vignal et al. 2001, Hotta et al. 1996). The effect of RHOG activity on cellular morphology, exhibited in the formation of microtubule-dependent cellular protrusions, depends both on RHOG interaction with KTN1, as well as on the kinesin activity (Vignal et al. 2001). RHOG and KTN1 also cooperate in microtubule-dependent lysosomal transport (Vignal et al. 2001).

IQGAP proteins IQGAP1, IQGAP2 and IQGAP3, bind RAC1 and CDC42 and stabilize them in their GTP-bound state (Kuroda et al. 1996, Swart-Mataraza et al. 2002, Wang et al. 2007). IQGAPs bind F-actin filaments and modulate cell shape and motility through regulation of G-actin/F-actin equilibrium (Brill et al. 1996, Fukata et al. 1997, Bashour et al. 1997, Wang et al. 2007, Pelikan-Conchaudron et al. 2011). Binding of IQGAPs to F-actin is inhibited by calmodulin (Bashour et al. 1997, Pelikan-Conchaudron et al. 2011). IQGAP1 is involved in the regulation of adherens junctions through its interaction with E-cadherin (CDH1) and catenins (CTTNB1 and CTTNA1) (Kuroda et al. 1998, Hage et al. 2009). IQGAP1 contributes to cell polarity and lamellipodia formation through its interaction with microtubules (Fukata et al. 2002, Suzuki and Takahashi 2008).

RHOQ (TC10) regulates the trafficking of CFTR (cystic fibrosis transmembrane conductance regulator) by binding to the Golgi-associated protein GOPC (also known as PIST, FIG and CAL). In the absence of RHOQ, GOPC bound to CFTR directs CFTR for lysosomal degradation, while GTP-bound RHOQ directs GOPC:CFTR complex to the plasma membrane, thereby rescuing CFTR (Neudauer et al. 2001, Cheng et al. 2005).

RAC1 and CDC42 activate WASP and WAVE proteins, members of the Wiskott-Aldrich Syndrome protein family. WASPs and WAVEs simultaneously interact with G-actin and the actin-related ARP2/3 complex, acting as nucleation promoting factors in actin polymerization (reviewed by Lane et al. 2014).

RHOA, RHOB, RHOC, RAC1 and CDC42 activate a subset of formin family members. Once activated, formins bind G-actin and the actin-bound profilins and accelerate actin polymerization, while some formins also interact with microtubules. Formin-mediated cytoskeletal reorganization plays important roles in cell motility, organelle trafficking and mitosis (reviewed by Kuhn and Geyer 2014).

Rhotekin (RTKN) and rhopilins (RHPN1 and RHPN2) are effectors of RHOA, RHOB and RHOC and have not been studied in detail. They regulate the organization of the actin cytoskeleton and are implicated in the establishment of cell polarity, cell motility and possibly endosome trafficking (Sudo et al. 2006, Watanabe et al. 1996, Fujita et al. 2000, Peck et al. 2002, Mircescu et al. 2002). Similar to formins (Miralles et al. 2003), cytoskeletal changes triggered by RTKN activation may lead to stimulation of SRF-mediated transcription (Reynaud et al. 2000).

RHO GTPases RAC1 and RAC2 are needed for activation of NADPH oxidase complexes 1, 2 and 3 (NOX1, NOX2 and NOX3), membrane associated enzymatic complexes that use NADPH as an electron donor to reduce oxygen and produce superoxide (O<sub>2</sub><sup>-</sup>). Superoxide serves as a secondary messenger and also directly contributes to the microbicidal activity of neutrophils (Knaus et al. 1991, Roberts et al. 1999, Kim and Dinauer 2001, Jyoti et al. 2014, Cheng et al. 2006, Miyano et al. 2006, Ueyama et al. 2006).

## References

Sahai E & Marshall CJ (2002). RHO-GTPases and cancer. *Nat. Rev. Cancer*, 2, 133-42. [🔗](#)

Amano M, Ito M, Kimura K, Fukata Y, Chihara K, Nakano T, ... Kaibuchi K (1996). Phosphorylation and activation of myosin by Rho-associated kinase (Rho-kinase). *J Biol Chem*, 271, 20246-9. [↗](#)

Ishizaki T, Maekawa M, Fujisawa K, Okawa K, Iwamatsu A, Fujita A, ... Narumiya S (1996). The small GTP-binding protein Rho binds to and activates a 160 kDa Ser/Thr protein kinase homologous to myotonic dystrophy kinase. *EMBO J*, 15, 1885-93. [↗](#)

Leung T, Chen XQ, Manser E & Lim L (1996). The p160 RhoA-binding kinase ROK alpha is a member of a kinase family and is involved in the reorganization of the cytoskeleton. *Mol. Cell. Biol.*, 16, 5313-27. [↗](#)

Ohashi K, Nagata K, Maekawa M, Ishizaki T, Narumiya S & Mizuno K (2000). Rho-associated kinase ROCK activates LIM-kinase 1 by phosphorylation at threonine 508 within the activation loop. *J Biol Chem*, 275, 3577-82. [↗](#)

## Edit history

| Date       | Action   | Author          |
|------------|----------|-----------------|
| 2007-04-03 | Created  | Gopinathrao G   |
| 2014-10-24 | Authored | Orlic-Milacic M |
| 2014-12-26 | Authored | Rivero Crespo F |
| 2015-02-02 | Edited   | Orlic-Milacic M |
| 2021-05-22 | Modified | Shorser S       |

## Entities found in this pathway (55)

| Input    | UniProt Id     | Input     | UniProt Id       | Input     | UniProt Id     |
|----------|----------------|-----------|------------------|-----------|----------------|
| AURKA    | Q96GD4         | AURKB     | Q96GD4           | BIRC5     | O15392         |
| BUB1     | O43683, O60566 | BUB1B     | O60566           | CDC20     | Q12834         |
| CDC25C   | P30307         | CDCA8     | Q53HL2           | CENPA     | P49450         |
| CENPE    | Q02224         | CENPF     | P49454           | CENPH     | Q9H3R5         |
| CENPK    | Q9BS16         | CENPL     | Q8N0S6           | CENPM     | Q9NSP4         |
| CENPN    | Q96H22         | CENPO     | Q9BU64           | CENPU     | Q71F23         |
| CFL1     | P23528         | CIT       | O14578, O14578-3 | DIAPH3    | Q9NSV4         |
| DSN1     | Q9H410         | ERCC6L    | Q2NKX8           | H2AFX     | P16104         |
| H2AFZ    | P0C0S5         | HIST1H2AJ | Q99878           | HIST1H2BH | P62807, Q93079 |
| HIST1H3F | P68431         | HIST2H2AC | Q16777           | INCENP    | Q9NQS7         |
| IQGAP3   | P46940, Q86VI3 | KIF14     | Q15058           | KIF18A    | Q8NI77         |
| KIF2C    | Q99661         | MAD2L1    | Q13257           | NCKAP1    | Q9Y2A7         |
| NDC80    | O14777         | NUDC      | Q9Y266           | NUF2      | Q9BZD4         |
| NUP37    | Q8NFH4         | NUP85     | Q9BW27           | PLK1      | P53350         |
| PRC1     | O43663         | RANBP2    | P49792           | RCC2      | Q9P258         |
| RHPN1    | Q8TCX5         | SGO1      | Q5FBB7           | SGO2      | Q562F6         |
| SKA1     | Q96BD8         | SKA2      | Q8WVK7           | SPC24     | Q8NBT2         |
| SPC25    | Q9HBM1         | TUBA1B    | P68363           | TUBA1C    | Q9BQE3         |
| ZWINT    | O95229         |           |                  |           |                |

## 6. Identifiers found

Below is a list of the input identifiers that have been found or mapped to an equivalent element in Reactome, classified by resource.

### Entities (436)

| Input     | UniProt Id       | Input    | UniProt Id     | Input    | UniProt Id             |
|-----------|------------------|----------|----------------|----------|------------------------|
| ACTR1A    | P61163           | ADAM10   | O14672         | ADCY7    | P51828                 |
| AIP       | Q9NWT8           | AKAP13   | Q12802         | ALYREF   | Q86V81                 |
| ANAPC11   | Q9NYG5           | ANAPC15  | P60006         | ANK3     | Q12955                 |
| ANLN      | Q9NQW6           | APH1B    | Q8WW43         | APOBEC3B | Q6NTF7, Q9UH17         |
| ARHGAP11A | Q6P4F7           | ARHGAP12 | Q8IWW6         | ARHGEF39 | Q8N4T4                 |
| ASF1B     | Q9Y294           | ASPA     | P45381         | ATP5MC1  | P05496, P48201, Q06055 |
| ATP5ME    | P56385           | ATP5PD   | O75947         | ATP5PF   | P18859                 |
| AURKA     | Q96GD4           | AURKAIP1 | Q9NWT8         | AURKB    | Q96GD4                 |
| BANF1     | O75531           | BIRC5    | O15392         | BLM      | P54132                 |
| BOLA2     | Q9H3K6           | BRIP1    | Q9BX63         | BUB1     | O43683, O60566         |
| BUB1B     | O60566           | ClQBP    | Q07021         | CBX8     | Q9HC52                 |
| CCDC59    | Q9P031           | CCNA2    | P20248         | CCNB1    | P14635                 |
| CCNB2     | O95067           | CCNE1    | P24864         | CCNE2    | O96020                 |
| CCNF      | P41002           | CCT4     | P50991         | CCT7     | Q99832                 |
| CD3D      | P04234, P09693   | CDC20    | Q12834         | CDC25A   | P30304                 |
| CDC25C    | P30307           | CDC45    | O75419         | CDC6     | Q99741                 |
| CDCA5     | Q96FF9           | CDCA8    | Q53HL2         | CDH6     | P55285, Q9ULB4         |
| CDK1      | P06493           | CDK2     | P24941         | CDK4     | P11802                 |
| CDKN2D    | P55273           | CDT1     | Q9H211         | CENPA    | P49450                 |
| CENPE     | Q02224           | CENPF    | P49454         | CENPH    | Q9H3R5                 |
| CENPK     | Q9BS16           | CENPL    | Q8N0S6         | CENPM    | Q9NSP4                 |
| CENPN     | Q96H22           | CENPO    | Q9BU64         | CENPU    | Q71F23                 |
| CENPW     | Q5EE01           | CENPX    | A8MT69         | CEP78    | Q5JTW2                 |
| CFL1      | P23528           | CHAC2    | Q8WUX2         | CHCHD1   | Q96BP2                 |
| CHCHD2    | Q9Y6H1           | CHEK1    | O14757         | CHEK2    | O96017                 |
| CIT       | O14578, O14578-3 | CKS1B    | P61024         | CNIH2    | Q6PI25                 |
| COL4A3BP  | Q9Y5P4-2         | COLGALT1 | Q8IYK4, Q8NBJ5 | COMMD4   | Q9H0A8                 |
| COPRS     | Q9NQ92           | COX5A    | P20674         | COX6A1   | P12074                 |
| CPSF3     | Q9UKF6           | CREBRF   | Q8IUR6         | CSK      | P41240                 |
| CSTF3     | Q12996           | DBF4     | Q9UBU7         | DCTPP1   | Q9H773                 |
| DCUN1D5   | Q9BTE7           | DCXR     | Q7Z4W1         | DDX39A   | O00148                 |
| DEPDC1B   | Q8WUY9           | DIAPH3   | Q9NSV4         | DLGAP5   | Q15398                 |
| DNAJC7    | Q99615           | DNAJC8   | O75937         | DRAP1    | Q14919                 |
| DRG1      | Q92597           | DSCC1    | Q9BVC3         | DSN1     | Q9H410                 |
| DTL       | Q9NZJ0           | DTYMK    | P23919         | DUT      | P33316-2               |
| E2F1      | Q01094           | E2F2     | Q16254         | E2F7     | Q96AV8                 |
| E2F8      | A0AVK6           | EBP      | Q15125         | ECT2     | Q9H8V3                 |
| EIF4A3    | P38919           | EME1     | A4GXA9, Q96AY2 | EPC1     | Q9H2F5                 |
| ERAL1     | O75616           | ERBIN    | Q96RT1         | ERCC6L   | Q2NKX8                 |

| Input     | UniProt Id     | Input    | UniProt Id                             | Input      | UniProt Id     |
|-----------|----------------|----------|----------------------------------------|------------|----------------|
| ERN1      | O75460         | ESCO2    | Q56NI9                                 | ESPL1      | Q14674         |
| EXO1      | Q9UQ84         | EXOSC2   | Q13868                                 | EXOSC7     | Q15024         |
| EZH2      | Q15910         | FANCA    | O15360                                 | FANCB      | Q8NB91         |
| FANCD2    | Q9BXW9         | FANCG    | O15287                                 | FANCI      | Q9NV11         |
| FBXO5     | Q9UKT4         | FEN1     | P39748                                 | FNIP2      | Q9P278         |
| FOXM1     | Q08050         | GAB2     | Q9UQC2                                 | GADD45GIP1 | Q8TAE8         |
| GCC2      | Q8IWJ2         | GEMIN6   | Q8WXD5                                 | GINS1      | Q14691         |
| GINS2     | Q9Y248         | GINS3    | Q9BRX5                                 | GINS4      | Q9BRT9         |
| GMFG      | O60234         | GMNN     | O75496                                 | GNA15      | P30679         |
| GOLGA2    | Q08379         | GPS1     | Q13098                                 | GRK6       | P43250         |
| GTF3A     | Q92664         | GTSE1    | Q9NYZ3                                 | H2AFX      | P16104         |
| H2AFZ     | POC0S5         | HAUS8    | Q9BT25                                 | HIST1H2AJ  | Q99878         |
| HIST1H2BH | P62807, Q93079 | HIST1H3C | Q71DI3                                 | HIST1H3F   | P68431         |
| HIST2H2AC | Q16777         | HJURP    | Q8NCD3                                 | HMGB2      | P26583         |
| HMMR      | O75330         | HNRNPA1  | P09651                                 | HNRNPC     | P07910         |
| HNRNPD    | Q14103         | HNRNPL   | P14866                                 | IDS        | P22304         |
| IL32      | P24001         | INCENP   | Q9NQS7                                 | IQGAP3     | P46940, Q86VI3 |
| IRS1      | P35568         | KAT2B    | Q92831                                 | KCNIP4     | Q6PIL6         |
| KIF11     | P52732         | KIF14    | Q15058                                 | KIF15      | Q9NS87         |
| KIF18A    | Q8NI77         | KIF18B   | Q86Y91                                 | KIF20A     | O95235         |
| KIF22     | Q14807         | KIF23    | Q02241                                 | KIF27      | Q86VH2         |
| KIF2C     | Q99661         | KIF4A    | O95239, Q2VIQ3                         | KIF4B      | O95239, Q2VIQ3 |
| KIFC1     | Q9BW19         | KPNA2    | P52292                                 | KPTN       | Q9Y664         |
| LGR4      | Q9BXB1         | LIMS1    | P48059                                 | LMBRD1     | Q9NUN5         |
| LMNB1     | P20700         | LRR1     | Q96L50                                 | LSM2       | Q9Y333         |
| LSM4      | Q9Y4Z0         | LSM5     | Q9Y4Y9                                 | LSM7       | Q9UK45         |
| MAD2L1    | Q13257         | MAD2L2   | Q9UI95                                 | MAGOH      | P61326, Q96A72 |
| MAGOH     | P61326, Q96A72 | MAML2    | Q8IZL2                                 | MAN2A1     | Q16706         |
| MAN2B1    | O00754         | MCM10    | Q7L590                                 | MCM2       | P33993, P49736 |
| MCM5      | P33992         | MCM6     | Q14566                                 | MCM7       | P33993         |
| MEF2D     | Q14814         | MEMO1    | Q9Y316                                 | MICOS10    | Q5TGZ0         |
| MIS18A    | Q9NYP9         | MND1     | Q9BWT6                                 | MRM3       | Q9HC36         |
| MRPL11    | Q9Y3B7         | MRPL12   | P52815                                 | MRPL20     | Q9BYC9         |
| MRPL21    | Q7Z2W9         | MRPL27   | Q8IXM3, Q9P0M9                         | MRPL38     | Q96DV4         |
| MRPL44    | Q9H9J2         | MRPL47   | Q9HD33                                 | MRPL51     | Q4U2R6         |
| MRPL52    | Q86TS9         | MRPL58   | Q14197                                 | MRPS12     | O15235         |
| MRPS15    | P82914         | MRPS17   | Q9Y2R5                                 | MRPS23     | Q9Y3D9         |
| MRPS24    | Q96EL2         | MRPS26   | Q9BYN8                                 | MRPS34     | P82930         |
| MRPS5     | P82675         | MRPS7    | Q9Y2R9                                 | MRPS9      | P82933         |
| MTMR3     | Q96QG7         | MYBL2    | P10244                                 | MZT2B      | Q6NZ67         |
| NARF      | Q8WVD3         | NCAPD2   | Q15021                                 | NCAPG      | Q9BPX3         |
| NCAPH     | Q15003         | NCKAP1   | Q9Y2A7                                 | NDC80      | O14777         |
| NDUFAB1   | O14561         | NDUFB11  | Q9NX14                                 | NDUFB9     | Q9Y6M9         |
| NDUFS5    | O43920         | NDUFS6   | O75380                                 | NEDD8      | Q15843         |
| NEIL3     | Q8TAT5         | NEK2     | P51955                                 | NFATC2     | Q12968, Q13469 |
| NHP2      | Q9NX24         | NIPAL2   | Q9H841                                 | NME1       | O60361, P15531 |
| NME2      | O60361, P22392 | NOC4L    | Q9BVI4                                 | NOL11      | Q9H8H0         |
| NOP56     | O00567         | NR3C2    | P08235-1, P08235-2, P08235-3, P08235-4 | NT5C3B     | Q969T7         |

| Input   | UniProt Id     | Input    | UniProt Id                             | Input    | UniProt Id     |
|---------|----------------|----------|----------------------------------------|----------|----------------|
| NUDC    | Q9Y266         | NUDT1    | P36639-1, P36639-2, P36639-3, P36639-4 | NUF2     | Q9BZD4         |
| NUP37   | Q8NFH4         | NUP85    | Q9BW27                                 | OIP5     | O43482         |
| ORC1    | Q13415         | ORC6     | Q9Y5N6                                 | OSMR     | Q99650         |
| P2RX7   | Q99572         | PA2G4    | Q9UQ80                                 | PABPN1   | Q86U42         |
| PAGR1   | Q9BTK6         | PAM16    | Q9Y3D7                                 | PCLAF    | Q15004         |
| PCYT2   | Q99447         | PDAP1    | Q13442                                 | PFDN4    | Q9NQP4         |
| PGP     | A6NDG6         | PHB      | P35232                                 | PHF19    | Q5T6S3         |
| PHKB    | Q93100         | PIF1     | Q9H611                                 | PKMYT1   | Q99640         |
| PLK1    | P53350         | PLK4     | O00444                                 | PLXNC1   | O60486         |
| POC1A   | Q8N3Y1         | POLA2    | Q14181                                 | POLD1    | P28340         |
| POLD2   | P49005         | POLE2    | P56282                                 | POLQ     | O75417         |
| POLR2D  | O15514         | POLR2F   | P61218                                 | POLR2I   | P36954         |
| POLR2J  | P52435         | POP7     | O75817                                 | PIIH     | O43447         |
| PPIL1   | Q9Y3C6         | PPIP5K1  | Q6PFW1                                 | PRC1     | O43663         |
| PRKAA1  | Q13131         | PSMA2    | P25787                                 | PSMA4    | P25789         |
| PSMA6   | P60900         | PSMB3    | P49720                                 | PSMB4    | P28070         |
| PSMB7   | P40306, Q99436 | PSMC1    | P62191                                 | PSMC3    | P17980         |
| PSMC3IP | Q9P2W1         | PSMC4    | P43686                                 | PSMC5    | P62195         |
| PSMD12  | O00232         | PSMD3    | O43242                                 | PTGES3   | Q15185         |
| PTPN6   | P29350         | PTTG1    | O95997                                 | RAC3     | P60763         |
| RACGAP1 | Q9H0H5         | RAD51    | Q06609                                 | RAD51AP1 | Q96B01         |
| RAD54L  | P46100         | RALGAPA2 | Q2PPJ7                                 | RAN      | P62826         |
| RANBP1  | P43487         | RANBP2   | P49792                                 | RASA1    | P20936         |
| RASEF   | Q7Z6P3         | RBL2     | Q08999                                 | RCC1     | P18754         |
| RCC2    | Q9P258         | RFC2     | P35249, P35250                         | RFC4     | P35249, P35250 |
| RFC5    | P40937, P40938 | RHPN1    | Q8TCX5                                 | RMI2     | Q96E14         |
| RPA3    | P35244         | RPL26L1  | Q9UNX3                                 | RPL38    | P63173         |
| RPL39L  | Q96EH5         | RPP21    | Q9H633                                 | RPP30    | P78346         |
| RRM2    | P31350         | RTRAF    | Q9Y224                                 | RUVBL2   | Q9Y230         |
| SAP30BP | Q9UHR5         | SARNP    | P82979                                 | SERINC5  | Q86VE9         |
| SFPQ    | P23246         | SGMS2    | Q8NHU3                                 | SGO1     | Q5FBB7         |
| SGO2    | Q562F6         | SGPP2    | Q8IWX5                                 | SKA1     | Q96BD8         |
| SKA2    | Q8WVK7         | SLBP     | Q14493                                 | SLC28A3  | Q9HAS3         |
| SLC6A6  | P31641         | SNF8     | Q96H20                                 | SNRNP25  | Q9BV90         |
| SNRPA   | P09012         | SNRPA1   | P09661                                 | SNRPB    | P14678, P63162 |
| SNRPC   | P09234         | SNRPD1   | P62314, P62316                         | SNRPD2   | P62316         |
| SNRPD3  | P62318         | SNRPE    | P62304                                 | SNRPF    | P62306         |
| SNRPG   | P62308         | SPATA13  | Q96N96                                 | SPC24    | Q8NBT2         |
| SPC25   | Q9HBM1         | SPRN     | Q5BIV9                                 | SRRT     | Q9BXP5         |
| SRSF2   | Q01130         | SRSF3    | P84103                                 | SSB      | P05455         |
| SSBP1   | Q04837         | STIP1    | P31948                                 | STMN1    | P16949         |
| SUMO2   | P61956         | SUV39H1  | O43463                                 | SUV39H2  | Q9H511         |
| SYCE2   | Q6PIF2         | TACC3    | Q9Y6A5                                 | TACO1    | Q9BSH4         |
| TANK    | Q92844         | TBC1D7   | Q9P0N9                                 | TBCE     | Q15813         |
| TFDP1   | Q14186         | TGOLN2   | O43493                                 | THOC6    | Q86W42         |
| THOP1   | P52888         | TIMELESS | Q9UNS1                                 | TIMM50   | Q3ZCQ8         |
| TIPIN   | Q9BVW5         | TK1      | P04183                                 | TMPO     | P42167-1       |
| TOMM22  | Q9NS69         | TOMM40   | O96008                                 | TOP2A    | P11388         |
| TPX2    | Q9ULW0         | TRA2B    | P62995                                 | TRAIP    | Q9BWF2         |

| Input  | UniProt Id | Input  | UniProt Id | Input  | UniProt Id     |
|--------|------------|--------|------------|--------|----------------|
| TUBA1B | P68363     | TUBA1C | Q9BQE3     | TUBG1  | P23258, Q9NRH3 |
| TUT7   | Q5VYS8     | TXNL4A | P83876     | TYMS   | P04818         |
| U2AF1  | Q01081     | U2AF2  | P26368     | UBE2C  | O00762         |
| UBE2L3 | P68036     | UBE2S  | Q16763     | UBE2T  | Q9NPD8         |
| UGCG   | Q16739     | UHRF1  | Q96T88     | UTP15  | Q8TED0         |
| UTP18  | Q9Y5J1     | UTRN   | P46939     | VDAC2  | P45880         |
| VRK1   | Q99986     | WDR34  | Q96EX3     | WDR77  | Q9BQA1         |
| WDR83  | Q9BRX9     | WRAP53 | Q9BUR4     | ZNF701 | Q9NV72         |
| ZNF791 | Q3KP31     | ZNRD1  | Q9P1U0     | ZSWIM8 | A7E2V4         |
| ZWINT  | O95229     |        |            |        |                |

| Input  | Ensembl Id                            | Input  | Ensembl Id                          | Input  | Ensembl Id      |
|--------|---------------------------------------|--------|-------------------------------------|--------|-----------------|
| AIP    | ENSG00000110711                       | BIRC5  | ENSG00000089685                     | BOLA2  | ENSG00000183336 |
| CCNA2  | ENSG00000145386                       | CCNB1  | ENSG00000134057                     | CCNB2  | ENSG00000157456 |
| CCNE1  | ENSG00000105173                       | CDC25A | ENSG00000164045                     | CDC25C | ENSG00000158402 |
| CDC45  | ENSG00000093009                       | CDC6   | ENSG00000094804                     | CDK1   | ENSG00000170312 |
| CDT1   | ENSG00000167513                       | CENPF  | ENSG00000117724                     | CFL1   | ENSG00000172757 |
| CHEK1  | ENSG00000149554,<br>ENST00000438015   | DLGAP5 | ENSG00000126787                     | DRG1   | ENSG00000104419 |
| E2F1   | ENSG00000101412                       | E2F7   | ENSG00000165891                     | EZH2   | ENSG00000106462 |
| FANCD2 | ENSG00000144554,<br>ENST00000419585   | FANCI  | ENSG00000140525,<br>ENST00000310775 | FBXO5  | ENSG00000112029 |
| KPNA2  | ENSG00000182481,<br>ENST00000330459.7 | LMNB1  | ENSG00000113368                     | MYBL2  | ENSG00000101057 |
| ORC1   | ENSG00000085840                       | PLK1   | ENSG00000166851                     | PTPN6  | ENSG00000111679 |
| RAD51  | ENSG00000051180                       | RBL2   | ENSG00000103479                     | RRM2   | ENSG00000171848 |
| SNRPA1 | ENSG00000131876                       | SSBP1  | ENSG00000106028                     | STMN1  | ENSG00000117632 |
| TK1    | ENSG00000167900                       | TOP2A  | ENSG00000131747                     | TYMS   | ENSG00000176890 |

## 7. Identifiers not found

These 193 identifiers were not found neither mapped to any entity in Reactome.

|          |          |          |          |           |          |          |           |
|----------|----------|----------|----------|-----------|----------|----------|-----------|
| ABHD2    | ALKBH4   | AMZ2     | ARL6IP1  | ASPM      | ATP5MD   | AUNIP    | BBOF1     |
| BCL2L12  | BCL7C    | BOLA3    | C12ORF10 | C12ORF57  | C17ORF53 | C17ORF67 | C19ORF48  |
| C20ORF27 | C4ORF46  | C5ORF34  | CARF     | CARHSP1   | CBX7     | CCDC124  | CCDC137   |
| CCDC138  | CCDC150  | CCDC167  | CCDC58   | CDCA2     | CDCA3    | CDCA4    | CDKN3     |
| CENPV    | CEP55    | CHAF1A   | CHAF1B   | CIP2A     | CISD1    | CKAP2L   | CKS2      |
| CLMN     | CRIM1    | DAZAP1   | DDIAS    | DEPDC1    | DNAJC9   | DPP8     | DUS1L     |
| ERI3     | FAM111B  | FAM136A  | FAM50A   | FAM72A    | FAM72B   | FAM72D   | FAM83D    |
| FBXO43   | FICD     | FKBP3    | FRMD4B   | FRY       | FYCO1    | GNB1L    | GPN3      |
| HASPIN   | HIVEP2   | HMGB3    | HMG2     | HNRNPAB   | HYPK     | ILKAP    | JPT1      |
| KCTD18   | KNSTRN   | LBHD1    | LCOR     | LEPROT    | LIMD2    | LMNB2    | LOC643387 |
| LSM12    | MAGI1    | MALSU1   | MARF1    | MAST4     | MAZ      | MEA1     | MELK      |
| METTL23  | METTL2A  | MFSD2B   | MINDY2   | MKI67     | MROH7    | MRT04    | MTRF2     |
| MXD3     | MZB1     | NAA10    | NBEAL1   | NCOA4     | NDUF8    | NFAT5    | NRM       |
| NUSAP1   | PAQR4    | PARBP    | PBK      | PBXIP1    | PDCL3    | PIMREG   | PLEKHA7   |
| PLEKHM3  | PPM1G    | PRPSAP1  | PRR11    | PSRC1     | PTMS     | PTPN21   | PTTG3P    |
| PUSL1    | RALY     | RAVER1   | RBM43    | RCCD1     | RDM1     | RECQL4   | RGPD3     |
| RGPD4    | RIBC2    | RNASEH2A | RNASEH2C | ROMO1     | RREB1    | RTKN2    | SAAL1     |
| SAC3D1   | SAPCD2   | SCART1   | SCNM1    | SECISBP2L | SH3BGRL3 | SHCBP1   | SIVA1     |
| SKA3     | SLC25A33 | SLC25A39 | SLC35B1  | SLC35F5   | SLC38A7  | SLIRP    | SMCR8     |
| SNRK     | SPAG5    | STAC3    | STIL     | STX12     | SUSD6    | TBC1D2B  | TCF19     |
| TCOF1    | TCP11L2  | TECPR1   | TEDC1    | TEDC2     | TEFM     | THAP3    | TICRR     |
| TM9SF2   | TMEM160  | TMPO-AS1 | TMSB15A  | TRAF4     | TRIP13   | TROAP    | TSC22D2   |
| TTK      | TYMSOS   | UBXN4    | VPS13C   | VPS16     | WDR54    | WDR62    | WDR74     |
| YDJC     | ZBTB38   | ZMYND10  | ZNF367   | ZNF444    | ZNF695   | ZNF827   | ZNFX1     |
| ZNHIT3   |          |          |          |           |          |          |           |
